# Supplementary material for: Role of MR1-driven signals and amphiregulin on the recruitment and repair function of MAIT cells during skin wound healing
Source: PubMed Central journal article supplement — Immunity. 2023 Jan 10;56(1):78–92.e6. doi: 10.1016/j.immuni.2022.12.004 (PMC9839364; doi:10.1016/j.immuni.2022.12.004), 2023-01-10
Supplement: mmc6.pdf [file mmc6.pdf]

# Immunity

## Role of MR1-driven signals and amphiregulin on the recruitment and repair function of MAIT cells during skin wound healing

### Graphical abstract

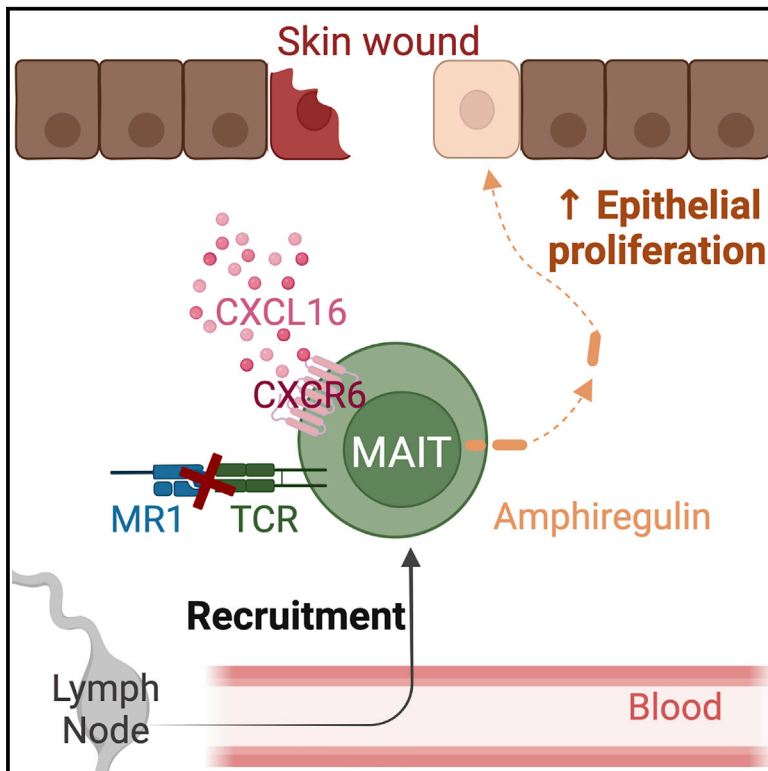

### Authors

Anastasia du Halgouet,  
Aurélie Darbois,  
Mansour Alkobtawi, ..., Rachel Golub,  
Olivier Lantz, Marion Salou

### Correspondence

olivier.lantz@curie.fr (O.L.),  
marion.salou@curie.fr (M.S.)

### In brief

MAIT cells have tissue repair properties, but the underlying mechanisms are unclear. du Halgouet et al. demonstrate that MAIT cells accelerate wound closure by increasing epithelial proliferation. MAIT cells are recruited into the injured skin in a CXCL16/CXCR6-dependent MR1-independent manner, and their pro-repair effect is related to amphiregulin production.

### Highlights

- MAIT cells accelerate wound closure in a human-like skin injury model
- MAIT cells migrate into the inflamed skin via CXCR6/CXCL16 and independently of MR1
- MAIT cell pro-repair function is independent of sustained TCR signaling
- Amphiregulin production by MAIT cells accelerates wound closure

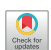

Article

# Role of MR1-driven signals and amphiregulin on the recruitment and repair function of MAIT cells during skin wound healing

Anastasia du Halgouet,<sup>1</sup> Aurélie Darbois,<sup>1</sup> Mansour Alkobtawi,<sup>2</sup> Martin Mestdagh,<sup>1</sup> Aurélie Alphonse,<sup>1</sup> Virginie Premel,<sup>1</sup> Thomas Yvorra,<sup>3</sup> Ludovic Colombeau,<sup>3</sup> Raphaël Rodriguez,<sup>3</sup> Dietmar Zaiss,<sup>4,8,9,10</sup> Yara El Morr,<sup>1</sup> Hélène Bugaut,<sup>1</sup> François Legoux,<sup>1</sup> Laetitia Perrin,<sup>1</sup> Selim Aractingi,<sup>2</sup> Rachel Golub,<sup>5</sup> Olivier Lantz,<sup>1,6,7,11,\*</sup> and Marion Salou<sup>1,11,12,\*</sup>

<sup>1</sup>INSERM U932, PSL University, Institut Curie, 75005 Paris, France

<sup>2</sup>Cutaneous Biology, Institut Cochin, Inserm 1016, and Université de Paris Cité, 75014 Paris, France

<sup>3</sup>CNRS UMR 3666, INSERM U1143, Chemical Biology of Cancer Laboratory, PSL University, Institut Curie, 75005 Paris, France

<sup>4</sup>Department of Immune Medicine, University of Regensburg, Regensburg, Germany

<sup>5</sup>Institut Pasteur, Université Paris Cité, INSERM U1223, 75015 Paris, France

<sup>6</sup>Laboratoire d'Immunologie Clinique, Institut Curie, 75005 Paris, France

<sup>7</sup>Centre d'investigation Clinique en Biothérapie Gustave-Roussy Institut Curie (CIC-BT1428), Institut Curie, 75005 Paris, France

<sup>8</sup>Institute of Clinical Chemistry and Laboratory Medicine, University Hospital Regensburg, Regensburg, Germany

<sup>9</sup>Institute of Pathology, University Regensburg, Regensburg, Germany

<sup>10</sup>Leibniz Institute for Immunotherapy (LIT), Regensburg, Germany

<sup>11</sup>These authors contributed equally

<sup>12</sup>Lead contact

\*Correspondence: [olivier.lantz@curie.fr](mailto:olivier.lantz@curie.fr) (O.L.), [marion.salou@curie.fr](mailto:marion.salou@curie.fr) (M.S.)

<https://doi.org/10.1016/j.immuni.2022.12.004>

## SUMMARY

Tissue repair processes maintain proper organ function following mechanical or infection-related damage. In addition to antibacterial properties, mucosal associated invariant T (MAIT) cells express a tissue repair transcriptomic program and promote skin wound healing when expanded. Herein, we use a human-like mouse model of full-thickness skin excision to assess the underlying mechanisms of MAIT cell tissue repair function. Single-cell RNA sequencing analysis suggested that skin MAIT cells already express a repair program at steady state. Following skin excision, MAIT cells promoted keratinocyte proliferation, thereby accelerating healing. Using skin grafts, parabiosis, and adoptive transfer experiments, we show that MAIT cells migrated into the wound in a T cell receptor (TCR)-independent but CXCR6 chemokine receptor-dependent manner. Amphiregulin secreted by MAIT cells following excision promoted wound healing. Expression of the repair function was probably independent of sustained TCR stimulation. Overall, our study provides mechanistic insights into MAIT cell wound healing function in the skin.

## INTRODUCTION

Restoring skin barrier following damage is key to maintain its function. The first step of skin healing is an inflammatory phase preventing infection and promoting debris clearance. Then, proliferation and migration of keratinocytes, endothelial cells, and fibroblasts creates new tissue. The final remodeling and reorganization phase lasts for months.<sup>1</sup> Delayed or improper healing may result in pain and infection, up to cutaneous carcinogenesis and limb amputations. Understanding the fine tuning of skin healing is therefore crucial.

Anti-infectious and pro-inflammatory functions of T cells are well described, but several T cell subsets are also involved in skin homeostasis. Upon skin injury, type 17 commensal-specific CD8<sup>+</sup> T cells express type 2 cytokines leading to tissue

repair.<sup>2</sup> Skin  $\gamma\delta$  T cells also promote wound healing through secretion of various molecules including keratinocyte growth factors and interleukin-17 (IL-17).<sup>3,4</sup> Recently, mucosal associated invariant T (MAIT) cells have been shown to have tissue repair potential,<sup>5-6</sup> but the *in vivo* mechanisms involved are unclear.

In humans, MAIT cells represent the most abundant T cell subset with a single specificity.<sup>7,8</sup> MAIT cells recognize an unstable compound, 5-(2-oxopropylideneamino)-6-D-ribitylaminouracil (5-OP-RU), stabilized and presented by the major histocompatibility complex (MHC) class 1-related molecule MR1.<sup>9</sup> 5-OP-RU derives from the riboflavin (vitamin B2) synthesis pathway present in most bacteria and yeasts but not in animal cells.<sup>10</sup> In mice, MAIT cells encompass MAIT1 (expressing the transcription factor Tbet) and MAIT17 (expressing the transcription factor

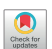

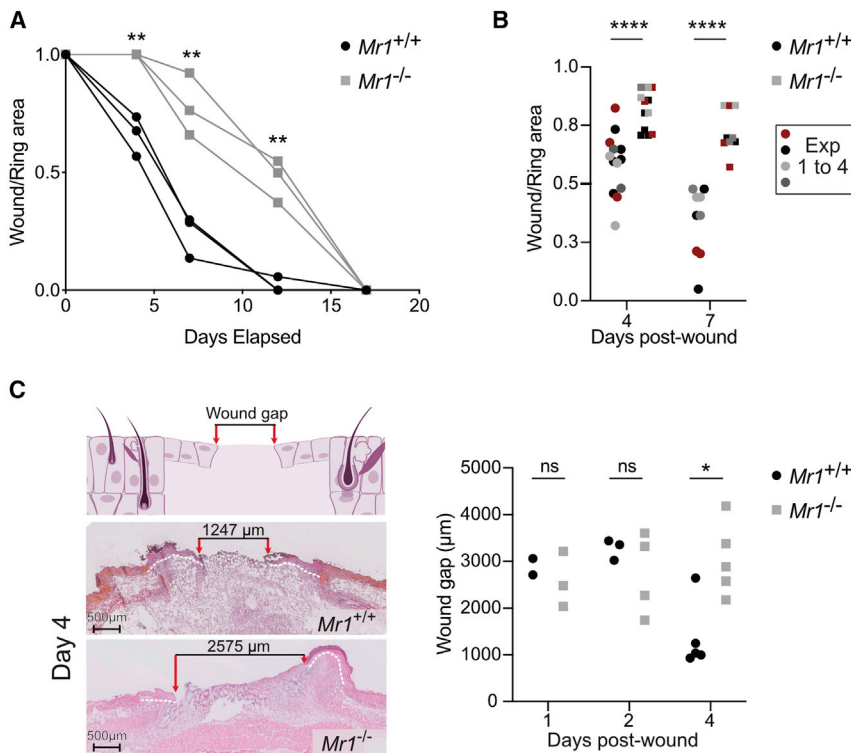

**Figure 1. MAIT cells accelerate wound closure**

Full-thickness wounds were performed on B6-MAIT<sup>CAST</sup> mice and splinted with a silicone ring to prevent epithelial contraction.

(A) Longitudinal follow-up of wound surface (ratio wound over ring areas) for *Mr1*<sup>+/+</sup> (black circle) or *Mr1*<sup>-/-</sup> (gray square) littermates. Blind experiment. t test.

(B) Wound surface at days 4 and 7. Pooled data from four independent experiments ( $n_4 = 13$ ;  $n_7 = 9$ ). Mann-Whitney test.

(C) Hematoxylin and eosin-saffron staining of *Mr1*<sup>+/+</sup> and *Mr1*<sup>-/-</sup> wounds 4 days after excision and longitudinal follow-up of wound gap (distance between the epithelial tongues). Pooled data from two independent experiments analyzed blindly ( $n_1 = 2/3$ ;  $n_2 = 3/4$ ;  $n_4 = 5$ ). Mann-Whitney test.

RORγt) cell subsets.<sup>11</sup> These subsets secrete different effector molecules, from interferon (IFN)-γ and cytotoxic molecules for MAIT1 cells to IL-17, (G)M-CSF ([granulocyte] monocyte colony stimulating factor), and tissue repair mediators for MAIT17 cells (reviewed in Legoux et al.<sup>12</sup>).

MAIT cells are numerous in human tissues, representing 2%–10% of T cells in the gut, around 4% in the lungs, and up to 15% in the liver.<sup>13</sup> Tissue homing is driven by the master transcription factor promyelocytic leukemia zinc finger (PLZF), which downregulates *Klf2* and its target *CD62L*.<sup>14</sup> Parabiosis experiments, which join the vascular systems of two mice, demonstrate that MAIT cells reside in the lungs, liver, and spleen at steady state, similar to invariant natural killer T (iNKT) cells.<sup>15,16</sup> Altogether, these innate-like T cell populations resemble mainstream tissue-resident memory (TRM) cells that remain in tissues following resolution of infection and confer protection upon reinfection.<sup>17</sup>

MAIT cells represent 0.5%–2% of T cells in the human skin,<sup>13</sup> reaching up to 40% in the mouse skin with a high variability range (1%–40% depending on cage origin).<sup>5,15</sup> The increase of MAIT cell numbers in *Tcrd*<sup>-/-</sup> mice<sup>5</sup> suggests competition for peripheral niches, but deletion of the T cell receptor (TCR) delta locus also influences the TCR alpha chain rearrangement process.<sup>18</sup> *In vivo*, after antigen-driven expansion, MAIT cells promote skin wound healing in C57BL/6 mice.<sup>5</sup> *In vitro*, MAIT cell culture supernatant promotes proliferation of an intestinal epithelial cell line.<sup>6</sup> Whether this holds true *in vivo* remains unknown. Moreover, the mechanisms triggering MAIT cell repair function have not been determined. *In vitro* analyses suggest that MAIT cells acquire tissue repair program following TCR triggering.<sup>19–6</sup> *In vivo*, whether recognition of microbiota-derived 5-OP-RU or

accelerated in the presence of MAIT cells and analyzed the mechanisms leading to MAIT cell accumulation at the wound site. We tested whether TCR triggering was necessary for either MAIT cell accumulation or tissue repair function. Finally, we explored the mechanisms favoring wound healing and showed a key role of MAIT cell-derived amphiregulin (Areg). Thus, our work unraveled migration and effector mechanisms leading to MAIT cell-dependent skin repair.

## RESULTS

### MAIT cells accelerate wound closure

Until now, the pro-repair functions of MAIT cells *in vivo* have been observed after increasing their numbers in the skin, either in *S. epidermidis*-associated *Tcrd*<sup>-/-</sup> animals or after topical application of 5-OP-RU in C57BL/6 mice.<sup>5</sup> To dissect the mechanisms by which MAIT cells improve skin wound healing in immunocompetent non-manipulated animals, we took advantage of the B6-MAIT<sup>CAST</sup> mouse strain with higher MAIT cell numbers than the C57BL/6 mice.<sup>20</sup> Of note, in the skin, MAIT cell numbers depend rather on the housing cages than on the strain used.<sup>5,15</sup> To prevent skin contraction occurring in mice but not in humans, full-thickness excision punches were splinted using a silicon ring.<sup>21</sup> We compared wound healing in the presence or absence of MAIT cells using *Mr1*<sup>+/+</sup> and *Mr1*<sup>-/-</sup> mice, respectively. Wound closure (assessed by the wound on ring area ratio) was faster in *Mr1*<sup>+/+</sup> as compared with *Mr1*<sup>-/-</sup> animals, as early as day 4 (Figures 1A and 1B). Analysis of hematoxylin and eosin-saffron-colored tissue sections evidenced smaller wound gaps at day 4 in *Mr1*<sup>+/+</sup> as compared with *Mr1*<sup>-/-</sup> animals (Figure 1C).

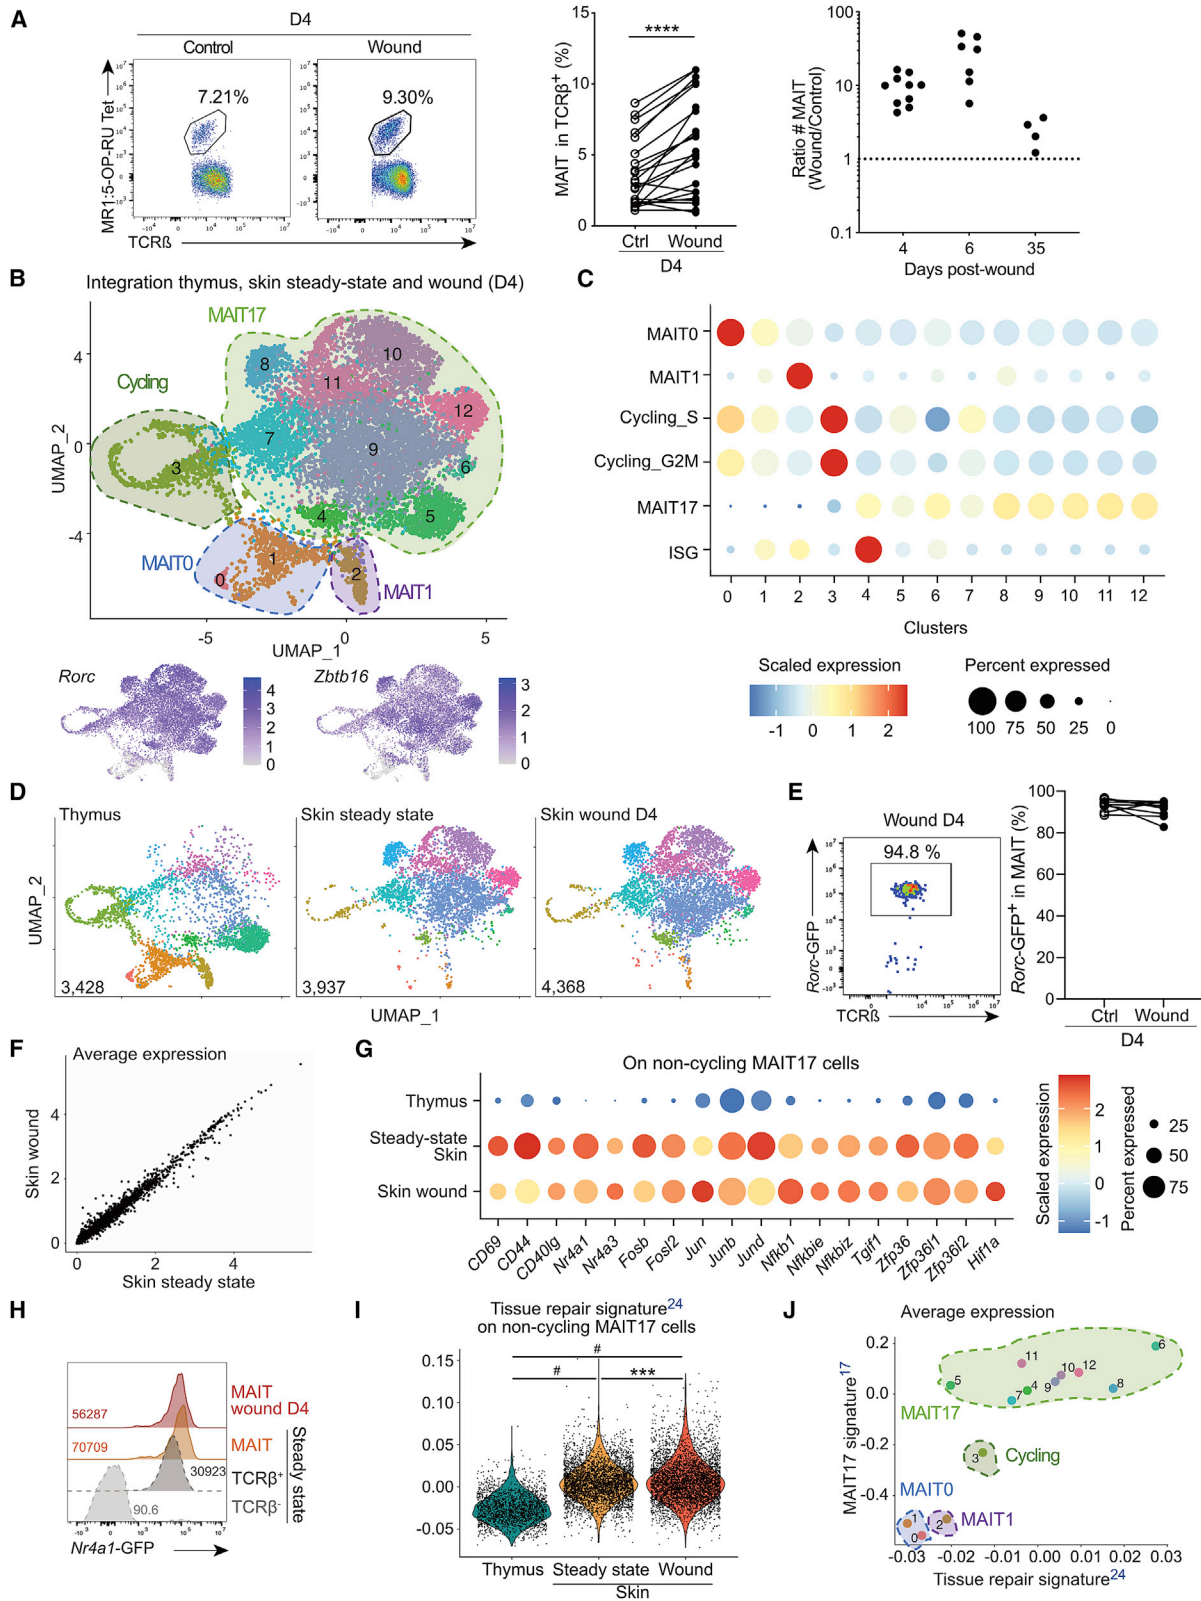

(legend on next page)



To test whether the MR1 molecule itself was involved in wound healing, we assessed wound closure in *Mr1<sup>+/+</sup>* and *Mr1<sup>-/-</sup>* mice devoid of T cells (*Cd3e<sup>-/-</sup>* mice). As expected in the absence of T cells, wound closure was delayed (50% closure at day 14 instead of day 6 in B6-MAIT<sup>CAST</sup> strain), but no difference was observed between *Mr1<sup>+/+</sup>* and *Mr1<sup>-/-</sup>* backgrounds (Figure S1A). In the T cell compartment, MR1 deficiency only affects MAIT cells.<sup>8,22</sup> Hence, MAIT cells accelerate wound healing early on in this human-like excision model.

### Skin MAIT cells are type 17, express a tissue repair program, and increase in numbers at the wound site

To better understand MAIT cell involvement in wound healing, we analyzed their number and phenotype in the skin. Four days after excision, the percentage of TCRβ<sup>+</sup>MR1:5-OP-RU Tet<sup>+</sup> MAIT cells (Figure S2A) was significantly increased at the wound site as compared with contra-lateral control skin (Figure 2A, left and middle panels). To account for the variability of MAIT cell numbers between animals,<sup>5</sup> the MAIT cell number at the wound site was normalized to the number from the same surface of the control site. MAIT cell numbers at the wound site increased up to 10-fold at days 4 and 6 and returned to basal numbers by day 35 (Figure 2A, right panel). Thus, skin repair is associated with a large and early increase of MAIT cell numbers following excision.

To provide an unbiased view of MAIT cell functions in the skin, we characterized their transcriptome at steady state and 4 days after excision using single-cell RNA sequencing (scRNA-seq) from B6-MAIT<sup>CAST</sup> mice. The two datasets were integrated together with a thymic dataset<sup>24</sup> to provide a reference (Figure 2B, top panel). Therefore, 12 clusters were defined. Based on expression of *Zbtb16* and *Rorc* (Figure 2B, bottom panel), as well as gene sets from the literature (Figure 2C; Table S1), MAIT0 (clusters 0 and 1), MAIT1 (cluster 2), cycling MAIT (cluster 3, mainly thymus), and MAIT17 (clusters 4–12) cells were identified. Despite low expression of the MAIT17 signature, cluster 3 belonged to the MAIT17 cell subtype, as seen by *Rorc* expression (Figure 2B). Importantly, MAIT1, MAIT17, and cycling cells from the three datasets merged, which demonstrated successful integration.

Analyzing the differentially expressed genes between all clusters (Table S2, adjusted p value < 0.05) allowed detailed

description of MAIT17 cell clusters. The thymus-specific cluster 5 (Figure 2D; Table S2) expressed the ribosomal *Rpl* and *Rps* genes, indicating active protein synthesis. On the contrary, the ribosomal genes were downregulated in the skin-specific cluster 6, suggesting resting cells. Many IFN-related genes (including *Isg15*, *Cxcl10*, *Ifit1*, *Stat1*, and *Bst2*) were expressed in cluster 4, defining IFN-stimulated gene-MAIT cells both in the thymus and skin, as described for thymic iNKT cells<sup>25</sup> (Figure 2C). *Gzmb* and *Gzmc* had the highest fold change in cluster 7 (Table S2), suggesting cytotoxic capacities. The skin-specific cluster 8 (Figure 2D) overexpressed genes associated with tissue repair such as *Il17a*, *Il17f*, *Areg*, the hypoxia-induced factor 1-alpha (HIF1α) *Hif1a*, *Irgav*, and *Fgl2* (Table S2). No specific function was identified in the remaining MAIT17 cell clusters (9–12) which represent variations of a common program. Thus, MAIT17 cells span various transcriptional states and effector functions, including a skin-specific subset expressing repair mediators.

In the skin, most MAIT cells were type 17 both before and after excision (Figures 2B and 2D), as confirmed at the protein level using a *Rorc*-GFP reporter mouse (Figure 2E) and intracellular staining for the transcription factors RORγt and Tbet (Figure S2B). Moreover, scRNA-seq datasets from wound and steady-state skins fully overlapped and were evenly distributed in the different clusters (Figures 2D and S2C). Furthermore, gene expression was highly correlated between the two datasets (Figure 2F), suggesting that the functional program responsible for accelerated wound closure was already expressed at a steady state. To better understand skin MAIT17 cell specificities, we compared skin and thymic MAIT17 cell clusters (Table S3). Skin MAIT17 cells were more activated with overexpression of *Cd69*, *Cd44*, *Nr4a1*, and *Nr4a3*, as well as *Jun*, *Fos*, and *Nfkb* pathways (Figure 2G; Table S3). TCR signaling in MAIT cells from the skin was confirmed by flow cytometry using the *Nr4a1*-GFP reporter mouse (Figure 2H). Additionally, skin MAIT17 cells overexpressed the TGF-β-induced factor homeobox *Tgif1* (Figure 2G). Accordingly, skin MAIT17 cells overexpressed genes identified in skin TRM cells expressing the TGFβR2 receptor<sup>26</sup> (Figure S2D). These results suggest that skin MAIT cells rely on TGF-β for retention and functions, similarly to mainstream TRM cells.<sup>26–29</sup> *Zfp36*, *Zfp36l1*, and *Zfp36l2* were also upregulated in skin MAIT17 cells (Table S3).

### Figure 2. Skin MAIT cells accumulate in the wound and constitute a homogeneous type 17 T cell population with a tissue repair program

- (A) Flow cytometry staining (left), frequency (middle), and number (left, ratio wound over control numbers) of skin MAIT cells from wound and control sites at various time points. Pooled data from seven (n = 22) and four (n<sub>D4</sub> = 10, n<sub>D6</sub> = 7, and n<sub>D35</sub> = 4) independent experiments for frequencies and numbers, respectively. Wilcoxon test.
- (B) MAIT cells sorted from thymus, wound (D4), and steady-state skin were analyzed by scRNA-seq and integrated. UMAP (Uniform Manifold Approximation and Projection, top) and features plot for *Zbtb16* and *Rorc* expression (bottom) are displayed.
- (C) Clusters were defined by signature enrichment (Table S1; STAR Methods).
- (D) UMAP from (B) split according to dataset origin.
- (E) *Rorc*-GFP reporter expression by MAIT cells from wound and control sites. Pooled data from three independent experiments (n = 8). Please also see Figure S2B.
- (F) Average gene expression from MAIT cells in wound site and steady-state skin.
- (G) Differentially expressed genes in non-cycling MAIT17 cells from skin (wound and steady state) as compared to thymus. The average expression was calculated on scaled data after subsetting MAIT17 clusters from (B).
- (H) *Nr4a1*-GFP reporter expression by skin MAIT cells from wound (red) and control (orange) skin sites, by steady-state non-MAIT TCRβ<sup>+</sup> (dark gray) and by TCRβ<sup>-</sup> (light gray) cells. Data are representative of two independent experiments (n = 5).
- (I) Tissue repair<sup>23</sup> signature score on non-cycling MAIT17 cells. Tukey's multiple comparison test. Please also see Figure S2E.
- (J) Average expression of tissue repair<sup>23</sup> and MAIT17<sup>15</sup> signatures on clusters from (B). Please also see Figure S2F.

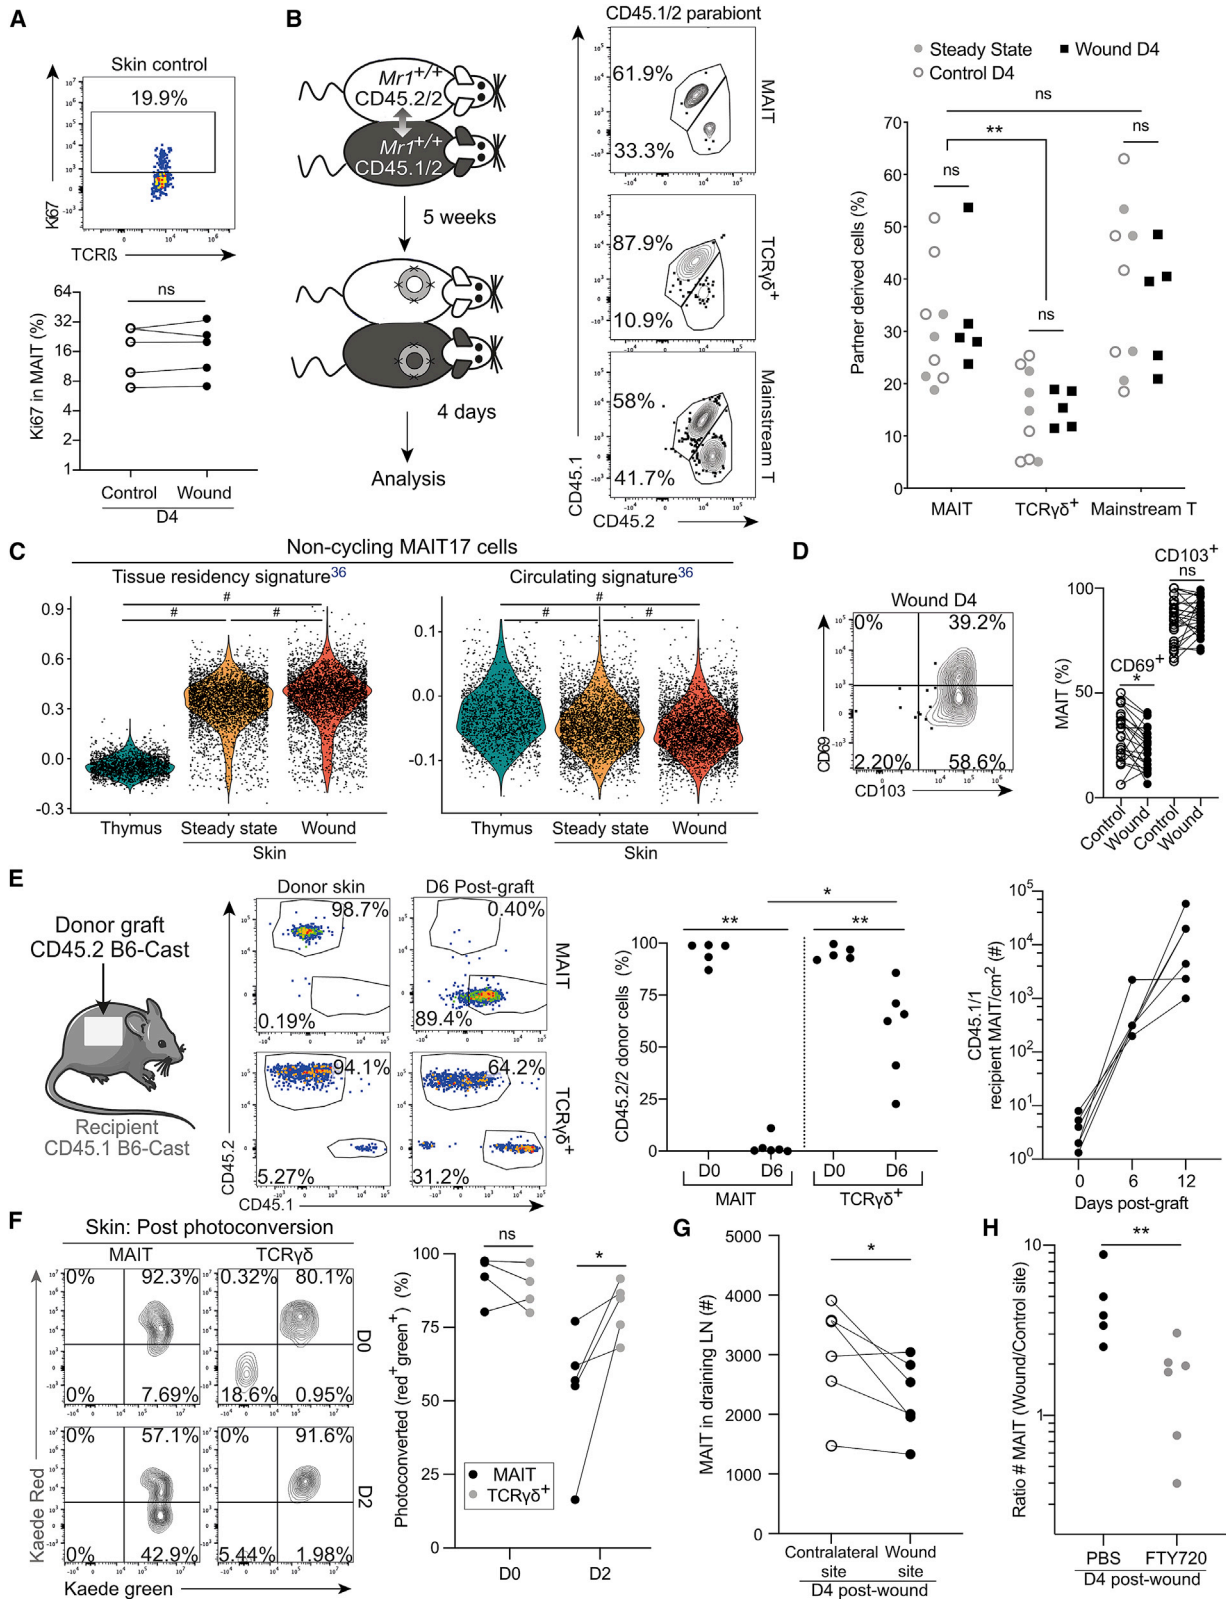

(legend on next page)

The corresponding proteins regulate the stability of mRNAs encoding cytokines and other immune mediators.<sup>30</sup>

Finally, overexpression of *Hif1a* (Figure 2G) suggested that skin MAIT17 cells have tissue repair capacity.<sup>31</sup> To formally assess this hypothesis, we tested the enrichment of a tissue repair signature from commensal-specific skin CD8<sup>+</sup> T cells<sup>23</sup> previously used to assess MAIT cell tissue repair potential.<sup>19</sup> All MAIT17 cells from the skin overexpressed the repair signature as compared with thymic cells (Figure 2I). This was confirmed using three other tissue repair gene sets expressed by Areg-producing regulatory T cells responsible for muscle<sup>32</sup> or lung<sup>33</sup> repair or demonstrated to have an *in vivo* repair function in full-thickness wounds (identified in the TiRe database<sup>34</sup>) (Figure S2E). On average, MAIT17 cells from cluster 8 highly expressed all four tissue repair signatures, as did the skin-specific clusters 6, 9, 10, and 12 (Figures 2I and S2F). MAIT17 cells from the thymus (cluster 5) slightly overexpressed the tissue repair signatures as compared with immature MAIT0 cells (Figures 2I and S2F). Thus, the MAIT17 cell program is associated with tissue repair functions, and skin location reinforced this program.

Altogether, the number of MAIT cells increased in the skin after excision, but their transcriptome was not modified. Notably, wound closure was correlated ( $R^2 = 0.40$ ) with the increase in T cell numbers (Figure S2G). The correlation was slightly higher ( $R^2 = 0.44$ ) with the increase of MAIT cell numbers in the wound (but not with the normalized percent of MAIT cells within T cells) (Figure S2H), further suggesting the involvement of MAIT cells in wound healing.

### MAIT cells are recruited to the inflamed skin

Increased MAIT cell number in the wound could result from either *in situ* proliferation or recruitment. Ki67 staining showed that MAIT cells proliferated similarly at wound and control sites (Figure 3A), suggesting that proliferation alone was not responsible for the increased number of MAIT cells in the wound. To determine whether MAIT cells were recruited, we performed skin excision on parabiotic pairs (Figure 3B, left panel). By contrast to lung MAIT cells which were mostly of host origin (Figure S3A), skin MAIT cells had exchanged between the two parabionts after 5 weeks of parabiosis: up to 50% of MAIT cells were partner derived in steady state, control, or wound skins (Figure 3B). This high exchange rate was not a technical artifact as skin  $\gamma\delta$  T cells remained in their original parabiont as expected.<sup>35</sup> Still,

higher expression of a residency signature (and slightly less expression of a circulating signature)<sup>36</sup> was observed in MAIT17 cells from the skin as compared with the thymus (Figure 3C). The shorter retention time of MAIT cells in the skin as compared with other organs could be related to their variable expression pattern of CD103 and CD69: while CD69 and CD103 are both necessary for virus-specific skin TRM persistence,<sup>37</sup> MAIT cells were mainly CD103<sup>+</sup> but expressed low to medium amounts of CD69 (Figure 3D).

As skin MAIT cells exchanged at steady state, parabiotic pairs were not suitable to study their trafficking after excision. We turned to a skin graft model (Figure 3E, left panel). Six days after grafting, all MAIT cells within the graft originated from the recipient, while around 70% of  $\gamma\delta$  T cells remained of graft origin (Figure 3E, middle panel), demonstrating possible MAIT cell recruitment into the skin. Moreover, MAIT cell numbers increased over time in the graft (Figure 3E, right panel), confirming their influx into the healing skin.

To assess whether MAIT cells were recruited from other organs or surrounding skin similarly to cutaneous  $\gamma\delta$  T cells,<sup>38,39</sup> we used the Kaede photoconvertible mouse. This mouse ubiquitously expresses the Kaede GFP, which shifts from green to red light emission after violet light illumination.<sup>40</sup> Following whole-body illumination (D0), all T cells including  $\gamma\delta$  T and MAIT cells were photoconverted (Green<sup>+</sup>Red<sup>+</sup>) in the skin (Figure 3F).  $\gamma\delta$  T cells remained largely photoconverted at day 2, confirming their residency in the skin. In contrast, skin MAIT cells were replaced by non-converted ones as soon as day 2 (Figure 3F). These results indicate recruitment from outside the skin as full-thickness skin comprising dermis and epidermis was photoconverted at day 0.

About 1%–10% of photoconverted MAIT and  $\gamma\delta$  T cells were recovered from the draining inguinal and brachial lymph nodes (LNs) at day 2 (Figure S3B), suggesting migration from the skin to the draining LNs, as described for  $\gamma\delta$  T cells.<sup>41</sup> Additionally, MAIT cell numbers were lower in the LNs draining the excision as compared with the contra-lateral sites (Figure 3G) and the LN of non-excised mice (Figure S3C). To test whether MAIT cells were recruited from the LNs to the wound, we treated excised mice with FTY720. This S1P receptor agonist blocks T cell egress from the LNs,<sup>42</sup> resulting in strong T cell decrease in the blood (Figure S3D). FTY720 blockade inhibited the increase of MAIT cell numbers in the wound (Figure 3H), suggesting traffic

### Figure 3. MAIT cells are recruited into the inflamed skin

- (A) Ki67 expression by MAIT cells. Data are from two ( $n = 5$ ) independent experiments. Wilcoxon test.  
 (B) Parabiosis protocol (left) and CD45.2/2 and CD45.1/2 staining (middle). Percentage of partner-derived MAIT,  $\gamma\delta$  T, and mainstream T cells in the skin (right) at steady-state and in the wound and control sites 4 days after excision. Data are from three independent experiments ( $n_{\text{steady state+control}} = 9$ ;  $n_{\text{excision}} = 5$ ). Sidák multiple comparison test. Please also see Figure S3A.  
 (C) Tissue residency and circulating<sup>36</sup> signature scores on non-cycling MAIT17 cells. Tukey's multiple comparison test.  
 (D) CD69 and CD103 expression by MAIT cells. Pooled data from six independent experiments ( $n_{\text{CD69}} = 23$ ;  $n_{\text{CD103}} = 27$ ). Wilcoxon test.  
 (E) Graft protocol and CD45.2 and CD45.1 staining (left). CD45.2 donor cell frequency in MAIT and  $\gamma\delta$  T cells from the donor skin (D0) and after 6 days in the graft (middle). Absolute number of recipient CD45.1<sup>+</sup> MAIT cells in grafts from D0, D6, and D12 (right, grafts from same donor are linked). Pooled data from two independent experiments ( $n_{\text{D0}} = 5$ ;  $n_{\text{D6}} = 3/6$ ;  $n_{\text{D12}} = 6$ ). Mann-Whitney and Wilcoxon tests as appropriate.  
 (F) Example of Kaede green and red expression (left) and frequency of photoconverted cell (right) in skin MAIT and  $\gamma\delta$  T cells. Pooled data from two independent experiments ( $n_{\text{D0}} = 4$ ,  $n_{\text{D2}} = 5$ ). Paired t test.  
 (G) The number of MAIT cells in the inguinal and brachial LNs draining the wound or the control sites. Pooled data from two independent experiments ( $n = 6$ ). Paired t test. Please also see Figures S3B and S3C.  
 (H) Numbers of MAIT cells (ratio wound over control sites) 4 days after excision in FTY720- or PBS-treated mice. Pooled data from two independent experiments ( $n_{\text{PBS}} = 5$ ;  $n_{\text{FTY720}} = 6$ ). Mann-Whitney test. Please also see Figure S3D.

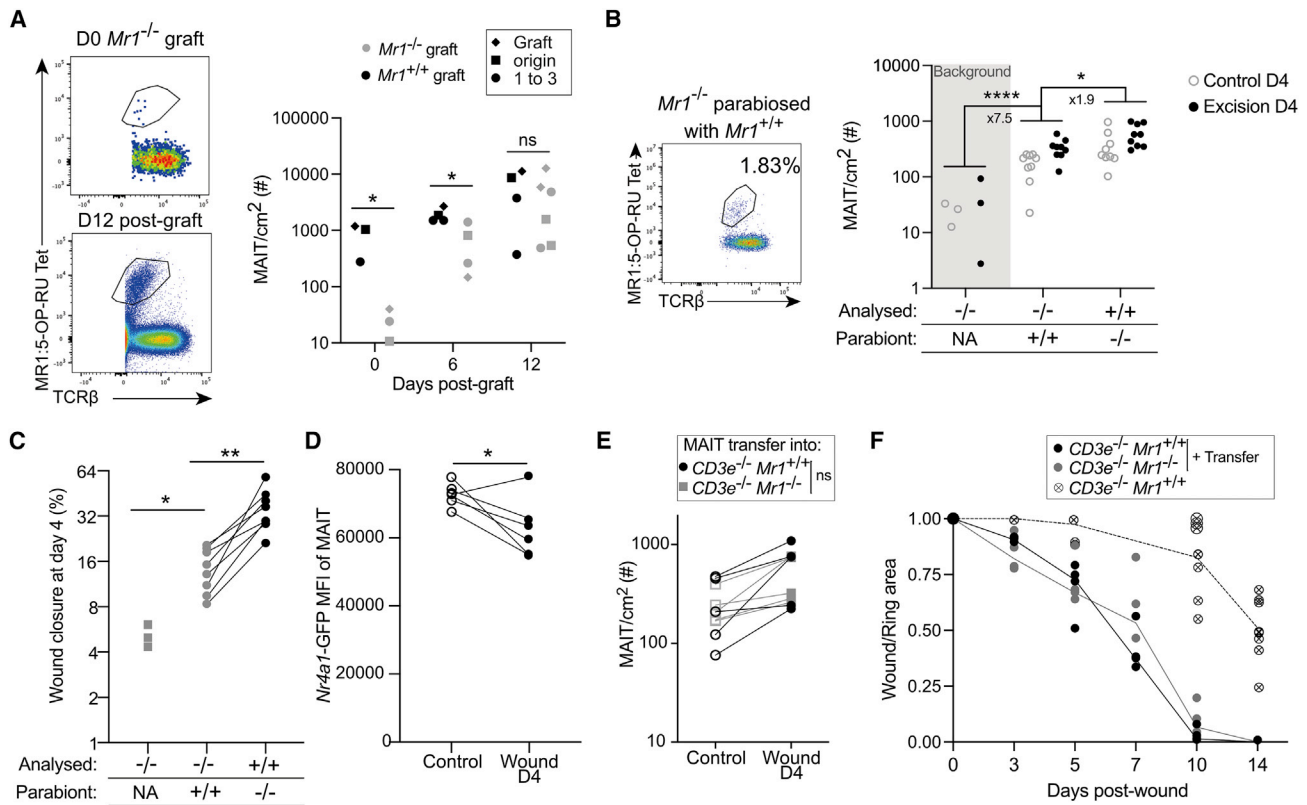

**Figure 4. MAIT cell recruitment and skin healing are independent of MR1**

(A) Grafts were performed on *Mr1*<sup>+/+</sup> animals. MAIT cell staining (left) and numbers (right) in *Mr1*<sup>-/-</sup> and *Mr1*<sup>+/+</sup> grafts before transplant (D0) and longitudinally after grafting. Pooled data from 2 independent experiments (*Mr1*<sup>+/+</sup>: n<sub>D0</sub> = 3, n<sub>D6,12</sub> = 4; *Mr1*<sup>-/-</sup>: n<sub>D0</sub> = 3, n<sub>D6</sub> = 4, n<sub>D12</sub> = 6). Unpaired t test.

(B) *Mr1*<sup>-/-</sup> and *Mr1*<sup>+/+</sup> mice were parabiosed for 5 weeks. MAIT cell staining in the skin of the *Mr1*<sup>-/-</sup> parabiont skin (left) and numbers at wound and control sites (right) for *Mr1*<sup>-/-</sup> and *Mr1*<sup>+/+</sup> parabionts and *Mr1*<sup>-/-</sup> control mice. Pooled data from two independent experiments (n<sub>*Mr1*<sup>-</sup> control</sub> = 3; n<sub>*Mr1*<sup>-</sup> parabiont</sub> = 9; n<sub>*Mr1*<sup>+</sup> parabiont</sub> = 9). Tukey multiple comparison test.

(C) Percent of wound closure in *Mr1*<sup>-/-</sup> and *Mr1*<sup>+/+</sup> parabionts and control *Mr1*<sup>-/-</sup> mice. Pooled data from two independent experiments (n<sub>*Mr1*<sup>-</sup> alone</sub> = 3; n<sub>*Mr1*<sup>-</sup> paired</sub> = 8; n<sub>*Mr1*<sup>+</sup> paired</sub> = 8). Mann-Whitney and Wilcoxon tests as appropriate.

(D) Mean fluorescence intensity of GFP expression on MAIT cells at wound and control skin sites in *Nr4a1*-GFP animals. Pooled data from two independent experiments (n = 6). Paired t test.

(E) MAIT cell numbers at wound and control sites 4 days after transfer into *Cd3e*<sup>-/-</sup> *Mr1*<sup>+/+</sup> and *Mr1*<sup>-/-</sup> mice. Pooled data from two independent experiments (n<sub>*Mr1*<sup>+</sup></sub> = 4; n<sub>*Mr1*<sup>-</sup></sub> = 4). Mann-Whitney test. Please also see Figures S4A–S4C.

(F) Longitudinal follow-up of wound surface of transferred *Cd3e*<sup>-/-</sup> *Mr1*<sup>+/+</sup> and *Mr1*<sup>-/-</sup> mice and non-transferred *Cd3e*<sup>-/-</sup> *Mr1*<sup>+/+</sup> control mice. Pooled data from two independent experiments with one blinded (n<sub>WithTransfer</sub> = 4/4; n<sub>WithoutTransfer</sub> = 8). Please also see Figure S4D.

through the LNs, despite the expression of a tissue residency transcriptional program in the skin.

### Cognate stimulation is not required for MAIT cell recruitment and repair functions

The full-thickness excision punch puts skin microbiota in direct contact with the wound. As the MAIT cell cognate ligand is produced by most skin bacteria,<sup>5,43</sup> we studied whether MAIT cell recruitment to the skin relied on ligand recognition. As a surrogate, we used *Mr1*<sup>-/-</sup> mice which do not present antigen to MAIT cells. MAIT cells infiltrated *Mr1*<sup>-/-</sup> skin grafted onto a *Mr1*<sup>+/+</sup> mouse, reaching similar numbers to those of *Mr1*<sup>+/+</sup> grafts (Figure 4A). In parabiosis experiments linking *Mr1*<sup>+/+</sup> and *Mr1*<sup>-/-</sup> mice, MAIT cell numbers in the skin of the *Mr1*<sup>-/-</sup> parabiont almost reached those of the *Mr1*<sup>+/+</sup> parabionts, both at control and wound sites (Figure 4B). Thus, MR1 expression on skin resident cells is not necessary for MAIT cell migration into the skin.

MAIT cell infiltration in the *Mr1*<sup>-/-</sup> parabiont was associated with increased wound closure as compared with mice devoid of MAIT cells (Figure 4C), suggesting that MAIT cell TCR triggering is not necessary for wound healing. This result is consistent with the decrease of *Nr4a1*-GFP reporter expression in MAIT cells following excision (Figure 4D). Still, wound closure was delayed in *Mr1*<sup>-/-</sup> as compared with the *Mr1*<sup>+/+</sup> parabionts (Figure 4C), which might be related to a lower number of MAIT cells (Figure 4B, right panel). Since other hematopoietic cells exchange during parabiosis, MR1 presentation may have occurred in the wound of *Mr1*<sup>-/-</sup> animals or in the *Mr1*<sup>+/+</sup> parabiont before migration. To formally demonstrate that MAIT cell repair function was independent of cognate stimulation, we transferred *in vitro* expanded MAIT cells into excised *Cd3e*<sup>-/-</sup> mice. MR1:5-OP-RU tetramer<sup>+</sup>-enriched thymic cells were expanded using 5-OP-RU at day 0 and IL-2 for 10–15 days (Figure S4A; STAR Methods). Except for high expression of Ki67 and CD69, which are linked



to *in vitro* activation, expanded MAIT cells retained their MAIT17 phenotype (ROR $\gamma$ t<sup>+</sup>Tbet<sup>-</sup>) after expansion, with high CXCR6 expression and more than 50% of the cells being CD103<sup>+</sup> (Figure S4B). More than 96% of transferred cells were MAIT cells (Figure S4B), which was still the case *in vivo* after 4 days (Figure S4C). Transferring MAIT cells accelerated wound closure (Figure S4D). Expanded MAIT cells were then transferred into *Cd3e*<sup>-/-</sup> *Mr1*<sup>+/+</sup> and *Mr1*<sup>-/-</sup> animals. In this system, only transferred MAIT cells expressed MR1. Again, MAIT cell recruitment into the wound site (Figure 4E) and wound closure (Figure 4F) were independent of TCR triggering, as confirmed by the absence of *Nr4a1*-GFP expression by transferred cells both at transfer and 4 days later (Figure S4E). Thus, MAIT cell recruitment and involvement in wound healing do not rely on sustained cognate interactions with MR1-presenting cells.

### CXCR6 is necessary for MAIT cell recruitment to the wound site

Since MAIT cell migration to the wound was independent of MR1 expression, we assessed the role of chemokines, as proposed for MAIT cell recruitment to the lungs during *F. tularensis* infection.<sup>44</sup> We first blocked G protein interactions with chemokine receptors—thereby preventing chemokine signaling—by injecting pertussis toxin (Ptx) before skin excision. Like mainstream T cells (TCR $\beta$ <sup>+</sup> cells excluding MAIT and iNKT cells; Figure S5A), MAIT cell recruitment to the wound was strongly decreased (Figure 5A; raw numbers in Figure S5B). Consistent with their residency profile,  $\gamma\delta$  T cell numbers were not modified, indicating that Ptx injection did not impair cell viability. Analysis of the scRNA-seq datasets showed that *Cxcr6* and to a lesser extent *Ccr2* were specifically expressed by skin MAIT17 cells (Figure 5B). At the protein level, CXCR6 was expressed by most skin MAIT cells (Figure 5C), while CCR2 was expressed by only half of them (Figure S5C). CXCL16, the ligand for CXCR6, was upregulated in the total skin lysate after excision both in *Mr1*<sup>+/+</sup> and *Mr1*<sup>-/-</sup> animals (Figure 5D). By contrast, CCL2, the ligand for CCR2, was highly expressed, independently of the excision (Figure S5D).

We therefore focused on the CXCR6-CXCL16 interaction. *In vivo* blocking of CXCL16 significantly reduced recruitment of MAIT cells into the wound site (Figure 5E). To formally demonstrate the role of CXCR6 in MAIT cell recruitment into the wound, we deleted *Cxcr6* using CRISPR-Cas9 technology. Thymic MAIT cells were expanded *in vitro* as above (Figure S4A) before delivery of a ribonucleoprotein complex containing Cas9 and a guide RNA targeting *Cxcr6*. Deletion was highly efficient as shown by the loss of CXCR6 expression (Figure 5F, histogram). A 50/50 mixture of *Cxcr6*<sup>-/-</sup> and *Cxcr6*<sup>+/+</sup> MAIT cells was injected into *Cd3e*<sup>-/-</sup> mice 1 day after excision. Four days after transfer, most MAIT cells found in the control and wound sites were *Cxcr6*<sup>+/+</sup> (Figure 5F), indicating that CXCR6 is necessary for MAIT cell recruitment into the skin.

### MAIT cell-derived Areg promotes wound closure

To determine how MAIT cells promote tissue repair, we analyzed cytokines produced *in vivo* at wound sites of *Mr1*<sup>+/+</sup> and *Mr1*<sup>-/-</sup> animals (Figure S6A). In *Mr1*<sup>+/+</sup> animals, we observed an upregulation of several molecules involved in antibacterial responses (resistin, CXCL10), epithelial proliferation, or angiogenesis (PDGF-BB, angiopoietin-1 and angiopoietin-2, FGF-21, WISP-

1/CCN4) and inflammation through recruitment or differentiation of immune cells (CXCL1, CXCL10, IL-1 $\beta$ , IL-17A, (G)M-CSF). These results suggest that the whole repair process was increased at day 4 in *Mr1*<sup>+/+</sup> as compared with *Mr1*<sup>-/-</sup> animals. Accordingly, we assessed the effect of MAIT cells on epidermal proliferation using K14 (keratinocyte marker) and Ki67 immunofluorescence staining<sup>45</sup> (Figures 6A and 6B). The length of the epithelial tongue was increased from day 2 in *Mr1*<sup>+/+</sup> animals (Figure 6A), demonstrating that MAIT cells are involved early in the repair process. Ki67 staining in the epidermis (but not in the dermis, Figure S6B) was increased 4 days after excision (Figure 6B), indicating that MAIT cells stimulated early epithelial proliferation. To assess whether MAIT cells also affected angiogenesis, endothelial cells were stained using a CD31 antibody. The number of vessels was similar between *Mr1*<sup>+/+</sup> and *Mr1*<sup>-/-</sup> wound sections (Figure S6C). Thus, MAIT cells at early time points mainly favor the proliferation of epithelial cells.

MAIT cell effect could be either direct, through secretion of growth factors, or indirect, by recruiting other immune subsets (as seen in Meierovics et al.<sup>46</sup>). The numbers of mainstream T cells (TCR $\beta$ <sup>+</sup>MR1:5-OP-RU-Tet<sup>-</sup>CD1d: $\alpha$ GalCer-Tet<sup>-</sup>),  $\gamma\delta$  T cells, iNKT cells, Langherans cells as well as Ly6C<sup>hi</sup> and Ly6C<sup>lo</sup> monocytes were similarly modified in *Mr1*<sup>+/+</sup> and *Mr1*<sup>-/-</sup> animals throughout wound closure (Figure S6D). These results suggest that MAIT cells did not impact the recruitment of these populations and that the effect observed on keratinocyte proliferation was direct.

We therefore focused on direct MAIT cell effector functions. scRNA-seq analysis identified several pro-repair mediators described as secreted by MAIT cells<sup>19-6</sup> and overexpressed in skin versus thymic samples, including *Furin*, *Tgfb1*, and *Hmgb1* (Figure 6C). We further identified pro-repair mediators specific to cluster 8 (Figure 2A; Table S2) and upregulated in skin non-cycling MAIT17 cells (Figure 6C). *Il17a* and *Areg*, both described to favor tissue repair (reviewed in McGeachy et al.<sup>47</sup> and Zaiss et al.<sup>48</sup>), were among the most differentially expressed genes in cluster 8 (Figures 6C and 6D; Table S2). The role of IL-17 had been already well studied during tissue repair,<sup>4,49</sup> and we could not obtain consistent *ex vivo* IL-17 staining on skin MAIT cells (data not shown). Therefore, we decided to focus on Areg, as tissue repair signatures associated to Areg-producing regulatory T cells were overexpressed by skin MAIT cells (Figure S2F). Areg is an epidermal growth factor-like molecule mediating keratinocyte proliferation.<sup>48</sup> *Ex vivo* intracellular staining (no restimulation) confirmed that a higher frequency of skin MAIT cells produced Areg at the wound as compared with the control site (Figure 6E). In humans, MAIT cells expressed Areg following TCR stimulation,<sup>50</sup> but in our study, wound closure seemed independent of a sustained TCR triggering (Figure 4), suggesting that Areg could be secreted following other, TCR-independent, stimuli. We tested this hypothesis *in vitro* using *ex vivo* thymic MAIT cells as the numbers of skin MAIT cells were too low for *in vitro* testing and the transferred MAIT cells (Figure S4A) were of thymic origin. IL-18, which is secreted during wound healing,<sup>51</sup> induced similar amounts of Areg expression as compared with 5-OP-RU stimulation (Figure 6F).

To determine whether Areg secretion was important for skin repair, we compared wound closure in *Areg*<sup>fl/fl</sup> *Zbtb16*-cre<sup>+</sup>

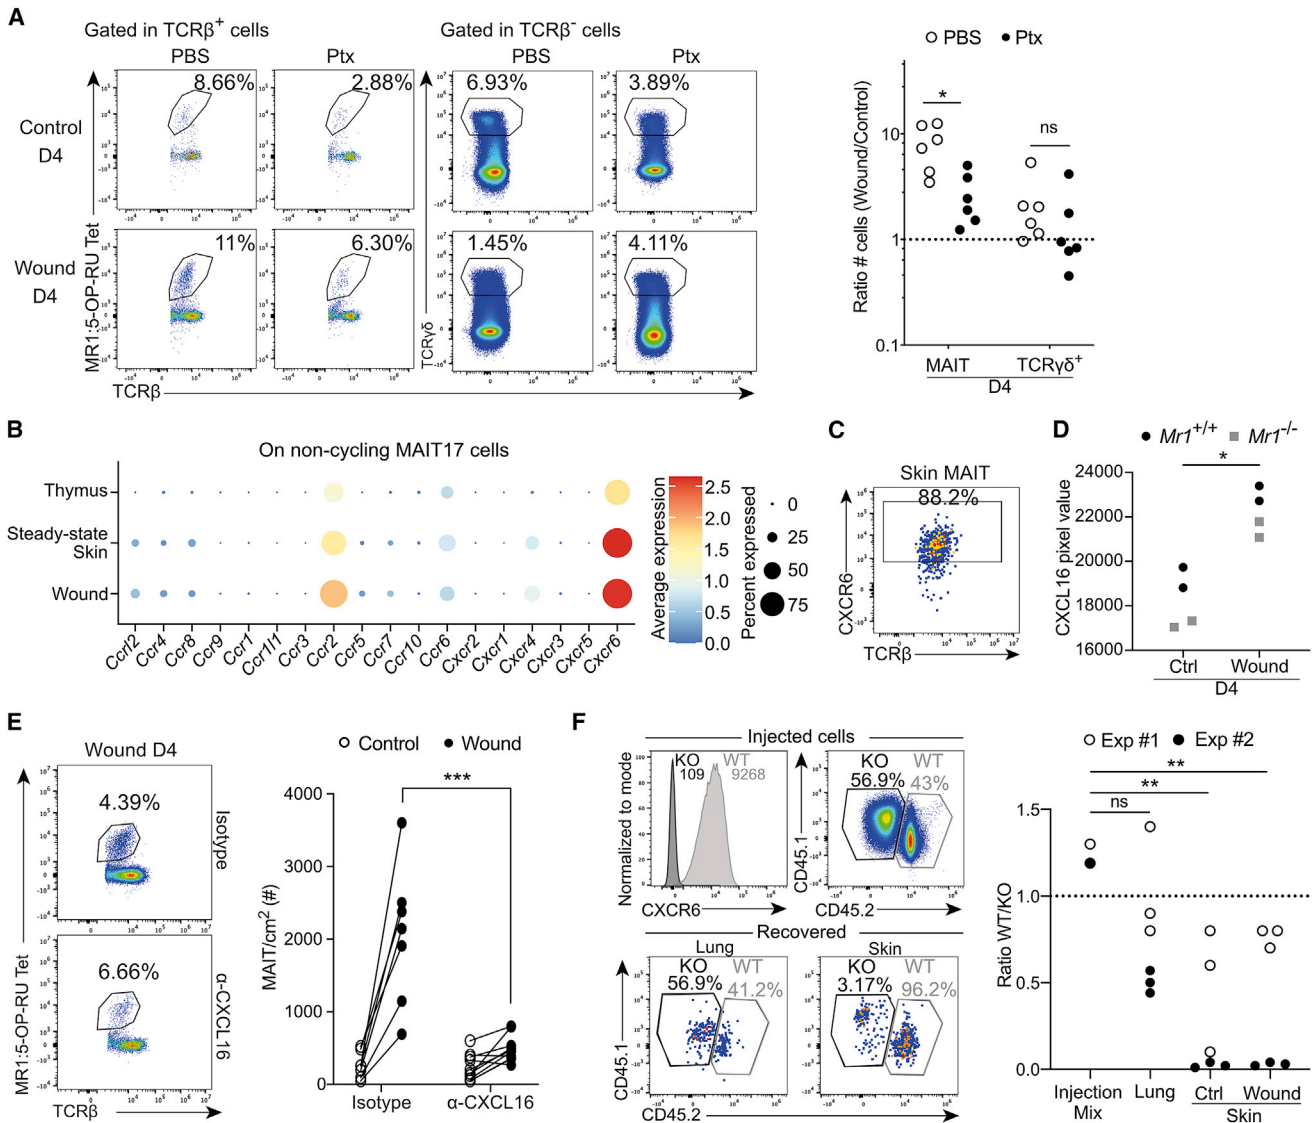

**Figure 5. CXCR6 is necessary for MAIT cell recruitment into the skin**

(A) MAIT and  $\gamma\delta$  T cell staining (left) and numbers (wound over control sites) (right) in skin control and wound (D4) sites following Ptx injection. Pooled data from two independent experiments ( $n = 6$ ). Mann-Whitney test. Please also see Figures S5A and S5B.

(B) Chemokine receptor gene expression by non-cycling MAIT17 cells from integrated single-cell datasets as in Figure 1B.

(C) CXCR6 expression by MAIT cells. Data are representative of 10 independent experiments.

(D) CXCL16 protein quantity in total skin lysate from wound (D4) or steady-state skin of  $Mr1^{+/+}$  and  $Mr1^{-/-}$  mice. Pooled data from two independent experiments ( $n = 4$ ). Mann-Whitney test.

(E) MAIT cell staining (left) and numbers (right) in control and wound (D4) skin sites following  $\alpha$ -CXCL16 or isotype control i.p. injection. Pooled data from two independent experiments ( $n = 7/10$ ). Mann-Whitney test.

(F) Expanded MAIT cells were deleted for *Cxcr6* by CRISPR-Cas9 modification. Congenic marker and CXCR6 expression on the injected pool (top left) or recovered cells (bottom left). Quantitation of recovered *Cxcr6*<sup>-/-</sup> cells (ratio of *Cxcr6*<sup>-/-</sup> over *Cxcr6*<sup>+/+</sup>) at different sites (right). Pooled data from two independent experiments ( $n_{\text{injection}} = 2$ ;  $n_{\text{other}} = 6$ ). Tukey's multiple comparison test.

and *Zbtb16-cre*<sup>-</sup> animals. The wound surface was increased at days 4 and 6 in *Zbtb16-cre*<sup>+</sup> animals, indicating that Areg expression by *Zbtb16*-expressing cells was involved in skin wound healing (Figure 6G). PLZF is expressed by MAIT cells, iNKT cells,<sup>52</sup> a subset of  $\gamma\delta$  T cells,<sup>53</sup> and transiently by one-third of embryonic cells during development.<sup>54</sup> To formally investigate the involvement of MAIT cell-derived Areg in skin wound healing,

we expanded thymic MAIT cells from *Areg*<sup>fl/fl</sup> *Zbtb16-cre*<sup>+</sup> or *Zbtb16-cre*<sup>-</sup> mice as above (Figure S4A). The resulting >95% pure MAIT cell populations were transferred into excised *Cd3e*<sup>-/-</sup>  $Mr1^{+/+}$  animals. Wound closure was significantly delayed when Areg-deficient MAIT cells were transferred (Figure 6H). Thus, Areg production by MAIT cells is central to their tissue repair function in skin wound healing.

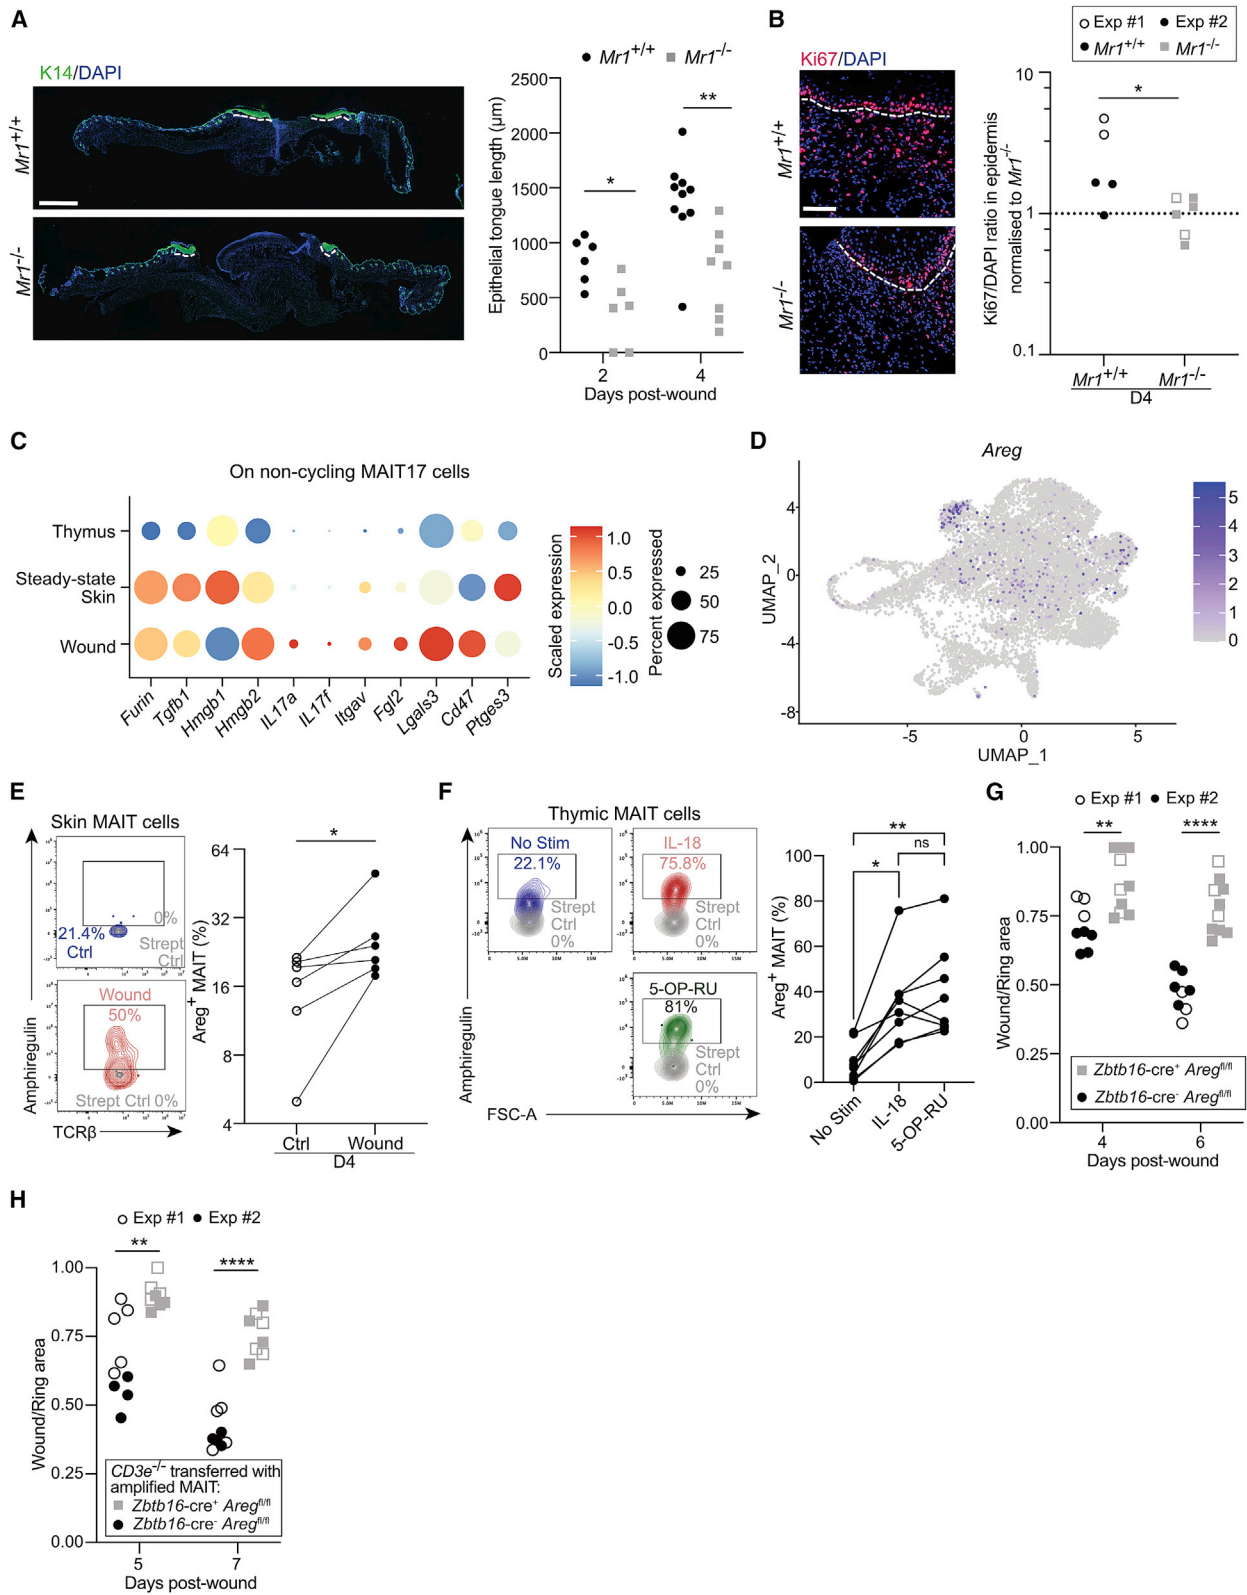

(legend on next page)

## DISCUSSION

In this study, we have assessed the *in vivo* mechanisms underlying MAIT cell repair functions in an immunocompetent host, using a human-like skin damage model. We showed that MAIT cells express a tissue repair program at steady state in the skin and improve wound closure. The repair function relied on MAIT cell recruitment into the wound, from distant sites including secondary lymphoid organs through the CXCR6-CXCL16 axis. Recruitment and wound healing function were independent of concomitant TCR stimulation. MAIT cell presence was associated with increased epithelial proliferation in the epidermis. Lastly, Areg production by MAIT cells was key to their tissue repair function.

Our previous work has shown that MAIT cells are tissue residents in the lungs, liver, and spleen.<sup>15</sup> Here, parabiosis experiments suggest that MAIT cells reside for shorter periods in the skin as compared with the lungs, in contrast to viral-specific TRM.<sup>55</sup> Previous results have shown no exchange of skin MAIT cells between parabionts within 13 weeks. These contradictory data may result from *S. epidermidis* colonization 7 weeks before parabiosis, therefore generating bona fide MAIT cell TRM in the skin.<sup>5</sup> However, skin MAIT17 cells in our study overexpressed a residency signature as compared with their thymic counterparts, both at steady state and at the wound site. The presence of photoconverted MAIT cells in the draining LN 2 days following photoconversion suggests that some skin MAIT cells recirculate, as shown for conventional antiviral TRM.<sup>56</sup> During wound healing, MAIT cells are recruited into the skin in a CXCR6-CXCL16-dependent manner. This mechanism is likely shared for MAIT cell recruitment to other organs as intranasal instillation of CXCL16 together with 5-OPRU drives MAIT cell accumulation into the lungs.<sup>44</sup> However, the role of CXCR6 is difficult to study *in vivo* as it is necessary for full MAIT cell maturation in the thymus.<sup>57</sup> *In vitro* expansion allowing CRISPR-Cas9-based genetic modification followed by adoptive transfer solved this issue. As human MAIT cells also express CXCR6,<sup>58</sup> recruitment could happen in pathological settings in which CXCL16 is produced such as non-alcoholic fatty liver disease, renal fibrosis, or certain cancers.<sup>59</sup>

Egress from secondary lymphoid organs was necessary for MAIT cell accumulation in the wound. Although MAIT cells

have been mainly described in mucosal tissues, our results suggest that LNs (or any tissue with an S1PR1-dependent egress mechanism) may act as a reservoir.<sup>60</sup> Accordingly, MAIT cell numbers decreased in the LN draining the wound, but this drop was too low to account for the large increase of MAIT cell number at the wound site. The constant albeit low proliferation of skin MAIT cells may contribute to increasing their numbers in the wound, but additional reservoirs likely exist. One hypothesis is that tissue-resident MAIT cells (from skin or other organs) return to the circulation, similarly to skin TRM upon reactivation.<sup>56</sup> Alternatively, another pool of non-resident MAIT cells may exist. MAIT cells being negative for CD62L and CCR7, they probably do not circulate from the blood directly to the LN. Instead, they would behave as effector memory T cells, migrating from blood to tissues, exiting tissues through the lymph in an S1PR1-dependent mechanism before going back to blood.<sup>17</sup> In humans, the existence of a circulating pool of MAIT cells is supported by the overlap of the TCR repertoire between MAIT cells from the thoracic duct and the blood.<sup>61</sup> In contrast with our results, FTY720 treatment of mice instilled with *F. tularensis* live vaccine did not hamper MAIT cell accumulation in the lungs,<sup>44</sup> suggesting different mechanisms in this model. Additionally, the increase of skin MAIT cell number following *S. epidermidis* association was similar in WT and LN-deficient animals (*Lta*<sup>-/-</sup>),<sup>5</sup> but the impact on skin wound healing was not studied. Altogether, pools of MAIT cells with different circulation profiles may be present in mice. Whether these pools are functionally different and exchange to some extent at steady state or during pathologies remain to be determined.

In our study, MAIT cell recruitment and tissue repair function did not rely on antigen presentation by MR1. This result seems contradictory with the tissue repair program induced by TCR triggering both in humans and mice.<sup>19-5</sup> In our study, skin MAIT cells expressed high amounts of Nur77 and a strong tissue repair program at steady state. Moreover, MAIT cells were expanded *in vitro* by adding 5-OP-RU once at the beginning of the culture. Thus, our data are consistent with TCR stimulation being necessary for program acquisition but not for actual tissue repair function. TCR stimulation at steady state is reminiscent of the tonic TCR signaling of pro-repair V $\gamma$ 5V $\delta$ 1 T cells.<sup>3,62</sup> Still, the actual triggering of MAIT cell repair function is probably not

### Figure 6. MAIT cell-derived Areg exerts a tissue repair function

- (A) Representative immunofluorescence images of wounds from *Mr1*<sup>+/+</sup> and *Mr1*<sup>-/-</sup> animals (DAPI in blue, K14 in green) (left). Scale bar represents 100  $\mu$ m. The epidermal tongues are underlined with white dashed lines and their length is quantified (right, D2/D4, 2 tongues per slide). Pooled data from one (D2: n = 3) and two independent experiments (D4: n = 5/4) analyzed blindly. Mann-Whitney test.
- (B) Representative immunofluorescence images of wounds from *Mr1*<sup>+/+</sup> and *Mr1*<sup>-/-</sup> animals (DAPI in blue, Ki67 in red). The white dashed line separates the epidermal tongue and the underlying dermis (left). Proliferation in the epidermis is quantified by the Ki67/DAPI ratio and normalized to the average expression in *Mr1*<sup>-/-</sup> animals for each experiment (right). Data are from two independent experiments (n = 5/6) analyzed blindly. Unpaired t test. Please also see Figure S6B.
- (C) Dot plot showing RNA expression of repair molecules by non-cycling MAIT17 cells from integrated single-cell datasets as in Figure 1B.
- (D) Feature plot of *Areg* expression projected on the UMAP of the integrated datasets.
- (E) *Ex vivo* Areg staining on skin MAIT cells (blue: control skin; red: wound skin; gray: full staining except the biotinylated anti-Areg antibody). Pooled data from two independent experiments (n = 6). Wilcoxon test.
- (F) Areg expression by thymic enriched MAIT cells following 36 h of *in vitro* activation by 5-OP-RU or IL-18. One experiment (n = 8) representative of 2. Dunn's multiple comparison test.
- (G) Wound surfaces at days 4 and 6 after excision on *Zbtb16-cre*<sup>-</sup> *Areg*<sup>fl/fl</sup> (black) and *Zbtb16-cre*<sup>+</sup> *Areg*<sup>fl/fl</sup> (gray). Pooled data from two independent experiments with one blind (full symbols) (n<sub>cre<sup>-</sup></sub> = 8; n<sub>cre<sup>+</sup></sub> = 10). Mann-Whitney tests.
- (H) Wound surfaces after excision (D5 and D7) of *Cd3e*<sup>-/-</sup> animals transferred with thymic MAIT cells expanded from *Zbtb16-cre*<sup>-</sup> *Areg*<sup>fl/fl</sup> (black) and *Zbtb16-cre*<sup>+</sup> *Areg*<sup>fl/fl</sup> (gray) littermate mice. Pooled data from two independent experiments with one blindly analyzed (full symbols) (n<sub>cre<sup>-</sup></sub> = 9; n<sub>cre<sup>+</sup></sub> = 8). Mann-Whitney tests.



dependent on TCR signaling as MAIT cells do not express Nur77 either at the time of transfer or after migration into the wound. Similarly, regulatory CD4<sup>+</sup> T cells in the lung following influenza infection secrete Areg even after TCR deletion.<sup>33</sup> Also, iNKT cells deleted for their TCR secrete IFN- $\gamma$  following lipopolysaccharide stimulation *in vivo*.<sup>63</sup> Licensing mechanisms independent of TCR signaling have been described for commensal-specific H2-M3-restricted CD8<sup>+</sup> T cells in the skin. At steady state, these type 17 cells express type 2 repair mediators at the RNA level only. Following tissue injury, alarmins promote secretion of the repair cytokines.<sup>2</sup> A similar translational checkpoint likely exists for MAIT cells, explaining the identical transcriptional program of skin MAIT cells at steady-state and wound sites. This hypothesis is supported by the expression of transcripts encoding ZFP36, ZFP36L1, and ZFP36L2 which regulate the stability of mRNA for cytokines or other immune mediators.<sup>30</sup> The repair functions may be elicited by cytokines such as IL-18, IL-4, IL-2, IL-7, and IL-21, whose receptors are expressed by skin MAIT cells (scRNA-seq, not shown). Accordingly, Areg secretion can be induced following IL-18 stimulation. Altogether, these results suggest that skin MAIT cells are in a poised functional state requiring additional signals to exert their tissue repair program.

The pro-repair effect of MAIT cells was mediated at least in part through Areg. In the skin, Areg produced in an autocrine manner promotes keratinocyte proliferation.<sup>64,65</sup> Accordingly, MAIT cell presence increased the size of the epidermal tongue as well as keratinocyte proliferation. Areg is also expressed by lung MAIT17 cells at steady state (M.S. et al.<sup>15</sup> unpublished data) and following *L. longbeachae* infection.<sup>19</sup> This molecule is produced by various cells of the immune system including innate cells as well as regulatory T cells, gingival  $\gamma\delta$  T cells,<sup>66</sup> ILC2,<sup>67</sup> and tumor-infiltrating CD8<sup>+</sup> T cells.<sup>68</sup> The multicellular origin of Areg suggests that multiple cell types may exert the same function. However, in our model, MAIT cell deletion alone delayed wound closure, suggesting non-redundant function in the early steps of skin healing. Skin MAIT cells also express ROR $\gamma$ t and probably secrete IL-17, a key effector molecule for the repair function of epidermal  $\gamma\delta$  T cells.<sup>4,49</sup> The IL-17 secreted by MAIT and  $\gamma\delta$  T cells could act similarly by inducing HIF1 $\alpha$  in epithelial cells and a subsequent shift toward glycolysis to promote their migration.<sup>49</sup> Although a non-redundant role of IL-17 was demonstrated using IL-17R-deficient epithelial cells, *Rorc* deletion in  $\gamma\delta$  T cells also affects other effector molecules regulated by ROR $\gamma$ t. Consequently, other effector molecules and other T cell subsets such as MAIT cells are likely important for skin wound healing. Understanding the relative contributions of IL-17 and Areg derived from one or another cell type, including at steady state, would help understanding the fine tuning of epithelial repair.

In summary, our work shows that MAIT cells play a pivotal role in skin wound healing. MAIT cell implication in different types of healing delay such as diabetic wounds would therefore be of interest. Understanding whether MAIT cells have such function in other tissues will assess their full effector potential to be able to manipulate them toward pro-inflammatory or pro-repair functions.

### Limitations of the study

One limitation of our study is the extensive digestion process at 37°C that may modify the transcriptional pattern of skin cells.

Therefore, we favored *in vivo* experiments to validate the results obtained using single-cell suspensions. Moreover, the transcriptome analysis did not distinguish MAIT cells preexisting in the skin from those recruited to the wound. Whether both subsets perform *in vivo* repair functions is unknown. The MAIT cell transfer into *Cd3e*<sup>-/-</sup> mice shows that the recruited ones do elicit the repair process. An additional question which would help improve our understanding of MAIT cell function is their precise location in the skin and their relationship with other cell types.

### STAR★METHODS

Detailed methods are provided in the online version of this paper and include the following:

- KEY RESOURCES TABLE
- RESOURCE AVAILABILITY
  - Lead contact
  - Materials availability
  - Experimental model and subject details
  - Method details
  - Parabiotic surgery
  - Skin graft
  - Kaedes photoconversion
  - Tissue processing
  - Flow cytometry
  - *Ex vivo* amphiregulin production
  - Single cell RNA sequencing
  - Single cell RNA-seq preprocessing
  - Single cell RNA analysis
  - Migration inhibition protocols (FTY20, Pertussis toxin and  $\alpha$ -CXCL16 treatments)
  - MAIT expansion and adoptive transfer
  - CXCR6 CRISPR-Cas9 genetic targeting
  - Proteome array
  - Immunostaining
  - Thymic MAIT cell *in vitro* activation
  - Quantification and statistical analysis

### SUPPLEMENTAL INFORMATION

Supplemental information can be found online at <https://doi.org/10.1016/j.immuni.2022.12.004>.

### ACKNOWLEDGMENTS

We thank the animal facility platform of the Institut Curie (V. Dangles-Marie, C. Alberti, C. Daviaud, M. Garcia, the mouse facility zootechnicians, and the genotyping platform), as well as the flow cytometry platform. We also thank the ICGex NGS platform of the Institut Curie for the help with the single-cell experiments. The ICGex NGS platform is supported by the grants ANR-10-EQPX-03 (Equipex) and ANR-10-INBS-09-08 (France Génomique Consortium) from the Agence Nationale de la Recherche (“Investissements d’Avenir” program), by ITMO-Cancer Aviesan (Plan Cancer III), and by the SiRIC-Curie program (SiRIC Grant INCa-DGOS-465 and INCa-DGOS-Inserm\_12554). Data management, quality control, and primary analysis were performed by the bioinformatics platform of the Institut Curie. We thank the Pathex and anatomo-pathology platforms of the Institut Curie. We are grateful to L. Gapin, R.A. Paiva, and J. Waterfall for critical reading of the manuscript and C. Hivroz for discussion. We thank the NIH Tetramer Core Facility (Emory University) for providing CD1d and MR1 tetramers. The MR1:5-OP-RU tetramer

technology was developed jointly by J. McCluskey, J. Rossjohn, and D. Fairlie, and the material was produced by the NIH Tetramer Core Facility as permitted to be distributed by the University of Melbourne. This study received funding from the following institutions: Institut National de la Santé et de la Recherche Médicale (O.L.), Institut Curie (O.L.), Agence Nationale de la Recherche Grant MAITANR-16-CE15-0020-01 (O.L.), Agence Nationale de la Recherche Grant MAIT-repair ANR-20-CE15-0028-01 (O.L.), Agence Nationale de la Recherche ANR-10-IDEX-0001-02 PSL (O.L.), European Research Council ERC-2019-ADG-885435 (O.L.), and Fondation pour la Recherche Médicale FDT202106013036 (A.d.H.).

#### AUTHOR CONTRIBUTIONS

Conceptualization, A.d.H., O.L., and M.S.; formal analysis, A.d.H., M.A., M.M., and M.S.; funding acquisition, O.L.; investigation, A.d.H., A.D., A.A., V.P., T.Y., L.C., Y.E.M., H.B., F.L., L.P., R.G., and M.S.; methodology, A.d.H., M.A., O.L., and M.S.; project administration, A.d.H.; resources, D.Z., R.G., S.A., T.Y., L.C., and R.R.; supervision, O.L. and M.S.; visualization, A.d.H. and M.S.; writing – original draft, A.d.H. and M.S.; writing – review & editing, A.d.H., O.L., and M.S.

#### DECLARATION OF INTERESTS

The authors declare no competing interests.

Received: June 5, 2022

Revised: September 2, 2022

Accepted: December 6, 2022

Published: January 10, 2023

#### REFERENCES

- Gurtner, G.C., Werner, S., Barrandon, Y., and Longaker, M.T. (2008). Wound repair and regeneration. *Nature* 453, 314–321. <https://doi.org/10.1038/nature07039>.
- Harrison, O.J., Linehan, J.L., Shih, H.-Y., Bouladoux, N., Han, S.-J., Smelkinson, M., Sen, S.K., Byrd, A.L., Enamorado, M., Yao, C., et al. (2019). Commensal-specific T cell plasticity promotes rapid tissue adaptation to injury. *Science* 363, eaat6280. <https://doi.org/10.1126/science.aat6280>.
- Jameson, J., Ugarte, K., Chen, N., Yachi, P., Fuchs, E., Boismenu, R., and Havran, W.L. (2002). A role for skin gammadelta T cells in wound repair. *Science* 296, 747–749. <https://doi.org/10.1126/science.1069639>.
- MacLeod, A.S., Hemmers, S., Garijo, O., Chabod, M., Mowen, K., Witherden, D.A., and Havran, W.L. (2013). Dendritic epidermal T cells regulate skin antimicrobial barrier function. *J. Clin. Invest.* 123, 4364–4374. <https://doi.org/10.1172/JCI70064>.
- Constantinides, M.G., Link, V.M., Tamoutounour, S., Wong, A.C., Perez-Chaparro, P.J., Han, S.-J., Chen, Y.E., Li, K., Farhat, S., Weckel, A., et al. (2019). MAIT cells are imprinted by the microbiota in early life and promote tissue repair. *Science* 366, eaax6624. <https://doi.org/10.1126/science.aax6624>.
- Leng, T., Akther, H.D., Hackstein, C.-P., Powell, K., King, T., Friedrich, M., Christoforidou, Z., McCuaig, S., Neyazi, M., Arancibia-Cárcamo, C.V., et al. (2019). TCR and inflammatory signals tune human MAIT cells to exert specific tissue repair and effector functions. *Cell Rep.* 28, 3077–3091.e5. <https://doi.org/10.1016/j.celrep.2019.08.050>.
- Martin, E., Treiner, E., Duban, L., Guerri, L., Laude, H., Toly, C., Premel, V., Devys, A., Moura, I.C., Tilloy, F., et al. (2009). Stepwise development of MAIT cells in mouse and human. *PLoS Biol.* 7, e54. <https://doi.org/10.1371/journal.pbio.1000054>.
- Franciszkiwicz, K., Salou, M., Legoux, F., Zhou, Q., Cui, Y., Bessoles, S., and Lantz, O. (2016). MHC class I-related molecule, MR1, and mucosal-associated invariant T cells. *Immunol. Rev.* 272, 120–138. <https://doi.org/10.1111/immr.12423>.
- Corbett, A.J., Eckle, S.B.G., Birkinshaw, R.W., Liu, L., Patel, O., Mahony, J., Chen, Z., Reantragoon, R., Meehan, B., Cao, H., et al. (2014). T-cell activation by transitory neo-antigens derived from distinct microbial pathways. *Nature* 509, 361–365. <https://doi.org/10.1038/nature13160>.
- Kjer-Nielsen, L., Patel, O., Corbett, A.J., Le Nours, J., Meehan, B., Liu, L., Bhati, M., Chen, Z., Kostenko, L., Reantragoon, R., et al. (2012). MR1 presents microbial vitamin B metabolites to MAIT cells. *Nature* 491, 717–723. <https://doi.org/10.1038/nature11605>.
- Rahimpour, A., Koay, H.F., Enders, A., Clanchy, R., Eckle, S.B.G., Meehan, B., Chen, Z., Whittle, B., Liu, L., Fairlie, D.P., et al. (2015). Identification of phenotypically and functionally heterogeneous mouse mucosal-associated invariant T cells using MR1 tetramers. *J. Exp. Med.* 212, 1095–1108. <https://doi.org/10.1084/jem.20142110>.
- Legoux, F., Salou, M., and Lantz, O. (2020). MAIT cell development and functions: the microbial connection. *Immunity* 53, 710–723. <https://doi.org/10.1016/j.immuni.2020.09.009>.
- Provine, N.M., and Klenerman, P. (2020). MAIT cells in health and disease. *Annu. Rev. Immunol.* 38, 203–228. <https://doi.org/10.1146/annurev-immunol-080719-015428>.
- Mao, A.-P., Constantinides, M.G., Mathew, R., Zuo, Z., Chen, X., Weirauch, M.T., and Bendelac, A. (2016). Multiple layers of transcriptional regulation by PLZF in NKT-cell development. *Proc. Natl. Acad. Sci. USA* 113, 7602–7607. <https://doi.org/10.1073/pnas.1601504113>.
- Salou, M., Legoux, F., Gilet, J., Darbois, A., du Hergouet, A., Alonso, R., Richer, W., Goubet, A.-G., Daviaud, C., Menger, L., et al. (2019). A common transcriptomic program acquired in the thymus defines tissue residency of MAIT and NKT subsets. *J. Exp. Med.* 216, 133–151. <https://doi.org/10.1084/jem.20181483>.
- Thomas, S.Y., Scanlon, S.T., Griewank, K.G., Constantinides, M.G., Savage, A.K., Barr, K.A., Meng, F., Luster, A.D., and Bendelac, A. (2011). PLZF induces an intravascular surveillance program mediated by long-lived LFA-1-ICAM-1 interactions. *J. Exp. Med.* 208, 1179–1188. <https://doi.org/10.1084/jem.20102630>.
- Masopust, D., and Soerens, A.G. (2019). Tissue-resident T cells and other resident leukocytes. *Annu. Rev. Immunol.* 37, 521–546. <https://doi.org/10.1146/annurev-immunol-042617-053214>.
- Dauphars, D.J., Mihai, A., Wang, L., Zhuang, Y., and Krangel, M.S. (2022). Trav15-dv6 family Tcrd rearrangements diversify the Tcr repertoire. *J. Exp. Med.* 219, e20211581. <https://doi.org/10.1084/jem.20211581>.
- Hinks, T.S.C., Marchi, E., Jabeen, M., Olshansky, M., Kurioka, A., Pediongco, T.J., Meehan, B.S., Kostenko, L., Turner, S.J., Corbett, A.J., et al. (2019). Activation and in vivo evolution of the MAIT cell transcriptome in mice and humans reveals tissue repair functionality. *Cell Rep.* 28, 3249–3262.e5. <https://doi.org/10.1016/j.celrep.2019.07.039>.
- Cui, Y., Franciszkiwicz, K., Mburu, Y.K., Mondot, S., Le Bourhis, L., Premel, V., Martin, E., Kachaner, A., Duban, L., Ingersoll, M.A., et al. (2015). Mucosal-associated invariant T cell-rich congenic mouse strain allows functional evaluation. *J. Clin. Invest.* 125, 4171–4185. <https://doi.org/10.1172/JCI82424>.
- Dunn, L., Prosser, H.C.G., Tan, J.T.M., Vanags, L.Z., Ng, M.K.C., and Bursill, C.A. (2013). Murine model of wound healing. *J. Vis. Exp.* e50265. <https://doi.org/10.3791/50265>.
- Treiner, E., Duban, L., Bahram, S., Radosavljevic, M., Wanner, V., Tilloy, F., Affricati, P., Gilfillan, S., and Lantz, O. (2003). Selection of evolutionarily conserved mucosal-associated invariant T cells by MR1. *Nature* 422, 164–169. <https://doi.org/10.1038/nature01433>.
- Linehan, J.L., Harrison, O.J., Han, S.-J., Byrd, A.L., Vujkovic-Cvijin, I., Villarino, A.V., Sen, S.K., Shaik, J., Smelkinson, M., Tamoutounour, S., et al. (2018). Non-classical immunity controls microbiota impact on skin immunity and tissue repair. *Cell* 172, 784–796.e18. <https://doi.org/10.1016/j.cell.2017.12.033>.
- Legoux, F., Gilet, J., Procopio, E., Echasserieau, K., Bernardeau, K., and Lantz, O. (2019). Molecular mechanisms of lineage decisions in metabolite-specific T cells. *Nat. Immunol.* 20, 1244–1255. <https://doi.org/10.1038/s41590-019-0465-3>.

25. Baranek, T., Lebrigand, K., de Amat Herbozo, C., Gonzalez, L., Bogard, G., Dietrich, C., Magnone, V., Boisseau, C., Jouan, Y., Trottein, F., et al. (2020). High dimensional single-cell analysis reveals iNKT cell developmental trajectories and effector fate decision. *Cell Rep.* 32, 108116. <https://doi.org/10.1016/j.celrep.2020.108116>.
26. Christo, S.N., Evrard, M., Park, S.L., Gandolfo, L.C., Burn, T.N., Fonseca, R., Newman, D.M., Alexandre, Y.O., Collins, N., Zamudio, N.M., et al. (2021). Discrete tissue microenvironments instruct diversity in resident memory T cell function and plasticity. *Nat. Immunol.* 22, 1140–1151. <https://doi.org/10.1038/s41590-021-01004-1>.
27. Casey, K.A., Fraser, K.A., Schenkel, J.M., Moran, A., Abt, M.C., Beura, L.K., Lucas, P.J., Artis, D., Wherry, E.J., Hogquist, K., et al. (2012). Antigen-independent differentiation and maintenance of effector-like resident memory T cells in tissues. *J. Immunol.* 188, 4866–4875. <https://doi.org/10.4049/jimmunol.1200402>.
28. Hirai, T., Yang, Y., Zenke, Y., Li, H., Chaudhri, V.K., De La Cruz Diaz, J.S., Zhou, P.Y., Nguyen, B.A.-T., Bartholin, L., Workman, C.J., et al. (2021). Competition for active TGF $\beta$  cytokine allows for selective retention of antigen-specific tissue-resident memory T cells in the epidermal niche. *Immunity* 54, 84–98.e5. <https://doi.org/10.1016/j.immuni.2020.10.022>.
29. Mackay, L.K., Wynne-Jones, E., Freestone, D., Pellicci, D.G., Mielke, L.A., Newman, D.M., Braun, A., Masson, F., Kallies, A., Belz, G.T., et al. (2015). T-box transcription factors combine with the cytokines TGF- $\beta$  and IL-15 to control tissue-resident memory T cell fate. *Immunity* 43, 1101–1111. <https://doi.org/10.1016/j.immuni.2015.11.008>.
30. Makita, S., Takatori, H., and Nakajima, H. (2021). Post-transcriptional regulation of immune responses and inflammatory diseases by RNA-binding ZFP36 family proteins. *Front. Immunol.* 12, 711633. <https://doi.org/10.3389/fimmu.2021.711633>.
31. Rezvani, H.R., Ali, N., Nissen, L.J., Harfouche, G., de Verneuil, H., Taïeb, A., and Mazurier, F. (2011). HIF-1 $\alpha$  in epidermis: oxygen sensing, cutaneous angiogenesis, Cancer, and non-cancer disorders. *J. Invest. Dermatol.* 131, 1793–1805. <https://doi.org/10.1038/jid.2011.141>.
32. Burzyn, D., Kuswanto, W., Kolodin, D., Shadrach, J.L., Cerletti, M., Jang, Y., Sefik, E., Tan, T.G., Wagers, A.J., Benoist, C., et al. (2013). A special population of regulatory T cells potentiates muscle repair. *Cell* 155, 1282–1295. <https://doi.org/10.1016/j.cell.2013.10.054>.
33. Arpaia, N., Green, J.A., Moltedo, B., Arvey, A., Hemmers, S., Yuan, S., Treuting, P.M., and Rudensky, A.Y. (2015). A distinct function of regulatory T cells in tissue protection. *Cell* 162, 1078–1089. <https://doi.org/10.1016/j.cell.2015.08.021>.
34. Yanai, H., Budovsky, A., Tacutu, R., Barzilay, T., Abramovich, A., Ziesche, R., and Fraifeld, V.E. (2016). Tissue repair genes: the TiRe database and its implication for skin wound healing. *Oncotarget* 7, 21145–21155. <https://doi.org/10.18632/oncotarget.8501>.
35. Tan, L., Sandrock, I., Odak, I., Aizenbud, Y., Wilharm, A., Barros-Martins, J., Tabib, Y., Borchers, A., Amado, T., Gangoda, L., et al. (2019). Single-cell transcriptomics identifies the adaptation of Scart1+ V $\gamma$ 6+ T cells to skin residency as activated effector cells. *Cell Rep.* 27, 3657–3671.e4. <https://doi.org/10.1016/j.celrep.2019.05.064>.
36. Milner, J.J., Toma, C., Yu, B., Zhang, K., Omilusik, K., Phan, A.T., Wang, D., Getzler, A.J., Nguyen, T., Crotty, S., et al. (2017). Runx3 programs CD8+ T cell residency in non-lymphoid tissues and tumours. *Nature* 552, 253–257. <https://doi.org/10.1038/nature24993>.
37. Mackay, L.K., Rahimpour, A., Ma, J.Z., Collins, N., Stock, A.T., Hafon, M.L., Vega-Ramos, J., Lauzurica, P., Mueller, S.N., Stefanovic, T., et al. (2013). The developmental pathway for CD103(+)/CD8+ tissue-resident memory T cells of skin. *Nat. Immunol.* 14, 1294–1301. <https://doi.org/10.1038/ni.2744>.
38. Sumaria, N., Roediger, B., Ng, L.G., Qin, J., Pinto, R., Cavanagh, L.L., Shklovskaya, E., Fazekas de St Groth, B., Triccas, J.A., and Weninger, W. (2011). Cutaneous immunosurveillance by self-renewing dermal  $\gamma\delta$  T cells. *J. Exp. Med.* 208, 505–518. <https://doi.org/10.1084/jem.20101824>.
39. O'Brien, R.L., and Born, W.K. (2015). Dermal  $\gamma\delta$  T cells—What have we learned? *Cell. Immunol.* 296, 62–69. <https://doi.org/10.1016/j.cellimm.2015.01.011>.
40. Tomura, M., Yoshida, N., Tanaka, J., Karasawa, S., Miwa, Y., Miyawaki, A., and Kanagawa, O. (2008). Monitoring cellular movement in vivo with photoconvertible fluorescence protein “Kaede” transgenic mice. *Proc. Natl. Acad. Sci. USA* 105, 10871–10876. <https://doi.org/10.1073/pnas.0802278105>.
41. Nakamizo, S., Egawa, G., Tomura, M., Sakai, S., Tsuchiya, S., Kitoh, A., Honda, T., Otsuka, A., Nakajima, S., Dainichi, T., et al. (2015). Dermal V $\gamma$ 4(+)  $\gamma\delta$  T cells possess a migratory potency to the draining lymph nodes and modulate CD8(+) T-cell activity through TNF- $\alpha$  production. *J. Invest. Dermatol.* 135, 1007–1015. <https://doi.org/10.1038/jid.2014.516>.
42. Brinkmann, V., Davis, M.D., Heise, C.E., Albert, R., Cottens, S., Hof, R., Bruns, C., Prieschl, E., Baumruker, T., Hiestand, P., et al. (2002). The immune modulator FTY720 targets sphingosine 1-phosphate receptors. *J. Biol. Chem.* 277, 21453–21457. <https://doi.org/10.1074/jbc.C200176200>.
43. Mondot, S., Boudinot, P., and Lantz, O. (2016). MAIT, MR1, microbes and riboflavin: a paradigm for the co-evolution of invariant TCRs and restricting MHC-like molecules? *Immunogenetics* 68, 537–548. <https://doi.org/10.1007/s00251-016-0927-9>.
44. Yu, H., Yang, A., Liu, L., Mak, J.Y.W., Fairlie, D.P., and Cowley, S. (2020). CXCL16 stimulates antigen-induced MAIT cell accumulation but trafficking during lung infection is CXCR6-independent. *Front. Immunol.* 11, 1773. <https://doi.org/10.3389/fimmu.2020.01773>.
45. Castela, M., Nassar, D., Sbeih, M., Jachiet, M., Wang, Z., and Aractingi, S. (2017). Ccl2/Ccr2 signalling recruits a distinct fetal microchimeric population that rescues delayed maternal wound healing. *Nat. Commun.* 8, 15463. <https://doi.org/10.1038/ncomms15463>.
46. Meierovics, A., Yankelevich, W.J.C., and Cowley, S.C. (2013). MAIT cells are critical for optimal mucosal immune responses during in vivo pulmonary bacterial infection. *Proc. Natl. Acad. Sci. USA* 110, E3119–E3128. <https://doi.org/10.1073/pnas.1302799110>.
47. McGeachy, M.J., Cua, D.J., and Gaffen, S.L. (2019). The IL-17 family of cytokines in health and disease. *Immunity* 50, 892–906. <https://doi.org/10.1016/j.immuni.2019.03.021>.
48. Zaiss, D.M.W., Gause, W.C., Osborne, L.C., and Artis, D. (2015). Emerging functions of amphiregulin in orchestrating immunity, inflammation, and tissue repair. *Immunity* 42, 216–226. <https://doi.org/10.1016/j.immuni.2015.01.020>.
49. Konieczny, P., Xing, Y., Sidhu, I., Subudhi, I., Mansfield, K.P., Hsieh, B., Biancur, D.E., Larsen, S.B., Cammer, M., Li, D., et al. (2022). Interleukin-17 governs hypoxic adaptation of injured epithelium. *Science* 377, eabg9302. <https://doi.org/10.1126/science.abg9302>.
50. Lamichhane, R., Schneider, M., de la Harpe, S.M., Harrop, T.W.R., Hannaway, R.F., Dearden, P.K., Kirman, J.R., Tyndall, J.D.A., Vernall, A.J., and Ussher, J.E. (2019). TCR- or cytokine-activated CD8+ mucosal-associated invariant T cells are rapid polyfunctional effectors that can coordinate immune responses. *Cell Rep.* 28, 3061–3076.e5. <https://doi.org/10.1016/j.celrep.2019.08.054>.
51. Kämpfer, H., Kalina, U., Mühl, H., Pfeilschifter, J., and Frank, S. (1999). Counterregulation of interleukin-18 mRNA and protein expression during cutaneous wound repair in mice. *J. Invest. Dermatol.* 113, 369–374. <https://doi.org/10.1046/j.1523-1747.1999.00704.x>.
52. Savage, A.K., Constantinides, M.G., Han, J., Picard, D., Martin, E., Li, B., Lantz, O., and Bendelac, A. (2008). The transcription factor PLZF directs the effector program of the NKT cell lineage. *Immunity* 29, 391–403. <https://doi.org/10.1016/j.immuni.2008.07.011>.
53. Kreslavsky, T., Savage, A.K., Hobbs, R., Gounari, F., Bronson, R., Pereira, P., Pandolfi, P.P., Bendelac, A., and von Boehmer, H. (2009). TCR-inducible PLZF transcription factor required for innate phenotype of a subset of gamma delta T cells with restricted TCR diversity. *Proc. Natl. Acad. Sci. USA* 106, 12453–12458. <https://doi.org/10.1073/pnas.0903895106>.

54. Constantinides, M.G., McDonald, B.D., Verhoef, P.A., and Bendelac, A. (2014). A committed precursor to innate lymphoid cells. *Nature* 508, 397–401. <https://doi.org/10.1038/nature13047>.
55. Slütter, B., Van Braeckel-Budimir, N., Abboud, G., Varga, S.M., Salek-Ardakani, S., and Harty, J.T. (2017). Dynamics of influenza-induced lung-resident memory T cells underlie waning heterosubtypic immunity. *Sci. Immunol.* 2, eaag2031. <https://doi.org/10.1126/sciimmunol.aag2031>.
56. Fonseca, R., Beura, L.K., Quarnstrom, C.F., Ghoneim, H.E., Fan, Y., Zebley, C.C., Scott, M.C., Fares-Frederickson, N.J., Wijeyesinghe, S., Thompson, E.A., et al. (2020). Developmental plasticity allows outside-in immune responses by resident memory T cells. *Nat. Immunol.* 21, 412–421. <https://doi.org/10.1038/s41590-020-0607-7>.
57. Koay, H.-F., Su, S., Amann-Zalcenstein, D., Daley, S.R., Comerford, I., Miosge, L., Whyte, C.E., Konstantinov, I.E., d'Udekem, Y., Baldwin, T., et al. (2019). A divergent transcriptional landscape underpins the development and functional branching of MAIT cells. *Sci. Immunol.* 4, eaay6039. <https://doi.org/10.1126/sciimmunol.aay6039>.
58. Dusseaux, M., Martin, E., Serriari, N., Péguillet, I., Premel, V., Louis, D., Milder, M., Le Bourhis, L., Soudais, C., Treiner, E., et al. (2011). Human MAIT cells are xenobiotic-resistant, tissue-targeted, CD161hi IL-17-secreting T cells. *Blood* 117, 1250–1259. <https://doi.org/10.1182/blood-2010-08-303339>.
59. Korbecki, J., Bajdak-Rusinek, K., Kupnicka, P., Kapczuk, P., Simińska, D., Chlubek, D., and Baranowska-Bosiacka, I. (2021). The role of CXCL16 in the pathogenesis of cancer and other diseases. *Int. J. Mol. Sci.* 22, 3490. <https://doi.org/10.3390/ijms22073490>.
60. Brinkmann, V., Billich, A., Baumruker, T., Heining, P., Schmouder, R., Francis, G., Aradhya, S., and Burtin, P. (2010). Fingolimod (FTY720): discovery and development of an oral drug to treat multiple sclerosis. *Nat. Rev. Drug Discov.* 9, 883–897. <https://doi.org/10.1038/nrd3248>.
61. Voillet, V., Buggert, M., Slichter, C.K., Berkson, J.D., Mair, F., Addison, M.M., Dori, Y., Nadolski, G., Itkin, M.G., Gottardo, R., et al. (2018). Human MAIT cells exit peripheral tissues and recirculate via lymph in steady state conditions. *JCI Insight* 3, e98487. <https://doi.org/10.1172/jci.insight.98487>.
62. Chodaczek, G., Papanna, V., Zal, M.A., and Zal, T. (2012). Body-barrier surveillance by epidermal  $\gamma\delta$  TCRs. *Nat. Immunol.* 13, 272–282. <https://doi.org/10.1038/ni.2240>.
63. Vahl, J.C., Heger, K., Knies, N., Hein, M.Y., Boon, L., Yagita, H., Polic, B., and Schmidt-Suppran, M. (2013). NKT cell-TCR expression activates conventional T cells in vivo, but is largely dispensable for mature NKT cell biology. *PLoS Biol.* 11, e1001589. <https://doi.org/10.1371/journal.pbio.1001589>.
64. Cook, P.W., Mattox, P.A., Keeble, W.W., Pittelkow, M.R., Plowman, G.D., Shoyab, M., Adelman, J.P., and Shipley, G.D. (1991). A heparin sulfate-regulated human keratinocyte autocrine factor is similar or identical to amphiregulin. *Mol. Cell. Biol.* 11, 2547–2557. <https://doi.org/10.1128/mcb.11.5.2547-2557.1991>.
65. Kennedy-Crispin, M., Billick, E., Mitsui, H., Gulati, N., Fujita, H., Gilleaudeau, P., Sullivan-Whalen, M., Johnson-Huang, L.M., Suárez-Fariñas, M., and Krueger, J.G. (2012). Human keratinocytes' response to injury upregulates CCL20 and other genes linking innate and adaptive immunity. *J. Invest. Dermatol.* 132, 105–113. <https://doi.org/10.1038/jid.2011.262>.
66. Krishnan, S., Prise, I.E., Wemyss, K., Schenck, L.P., Bridgeman, H.M., McClure, F.A., Zangerle-Murray, T., O'Boyle, C., Barbera, T.A., Mahmood, F., et al. (2018). Amphiregulin-producing  $\gamma\delta$  T cells are vital for safeguarding oral barrier immune homeostasis. *Proc. Natl. Acad. Sci. USA* 115, 10738–10743. <https://doi.org/10.1073/pnas.1802320115>.
67. Monticelli, L.A., Sonnenberg, G.F., Abt, M.C., Alenghat, T., Ziegler, C.G.K., Doering, T.A., Angelosanto, J.M., Laidlaw, B.J., Yang, C.Y., Sathaliyawala, T., et al. (2011). Innate lymphoid cells promote lung-tissue homeostasis after infection with influenza virus. *Nat. Immunol.* 12, 1045–1054. <https://doi.org/10.1031/ni.2131>.
68. Kwong, B.Y., Roberts, S.J., Silberzahn, T., Filler, R.B., Neustadter, J.H., Galan, A., Reddy, S., Lin, W.M., Ellis, P.D., Langford, C.F., et al. (2010). Molecular analysis of tumor-promoting CD8+ T cells in two-stage cutaneous chemical carcinogenesis. *J. Invest. Dermatol.* 130, 1726–1736. <https://doi.org/10.1038/jid.2009.362>.
69. Edgar, R., Domrachev, M., and Lash, A.E. (2002). Gene Expression Omnibus: NCBI gene expression and hybridization array data repository. *Nucleic Acids Res.* 30, 207–210.
70. Minutti, C.M., Modak, R.V., Macdonald, F., Li, F., Smyth, D.J., Dorward, D.A., Blair, N., Husovsky, C., Muir, A., Giampazolias, E., et al. (2019). A macrophage-pericyte axis directs tissue restoration via amphiregulin-induced transforming growth factor beta activation. *Immunity* 50, 645–654.e6. <https://doi.org/10.1016/j.immuni.2019.01.008>.
71. Malissen, M., Gillet, A., Ardouin, L., Bouvier, G., Trucy, J., Ferrier, P., Vivier, E., and Malissen, B. (1995). Altered T cell development in mice with a targeted mutation of the CD3-epsilon gene. *EMBO J.* 14, 4641–4653. <https://doi.org/10.1002/j.1460-2075.1995.tb00146.x>.
72. Zikherman, J., Parameswaran, R., and Weiss, A. (2012). Endogenous antigen tunes the responsiveness of naive B cells but not T cells. *Nature* 489, 160–164. <https://doi.org/10.1038/nature11311>.
73. Lochner, M., Peduto, L., Cherrier, M., Sawa, S., Langa, F., Varona, R., Riethmacher, D., Si-Tahar, M., Di Santo, J.P., and Eberl, G. (2008). In vivo equilibrium of proinflammatory IL-17+ and regulatory IL-10+ Foxp3+ ROR $\gamma$ t+ T cells. *J. Exp. Med.* 205, 1381–1393. <https://doi.org/10.1084/jem.20080034>.
74. Kamran, P., Sereti, K.-I., Zhao, P., Ali, S.R., Weissman, I.L., and Ardehali, R. (2013). Parabiosis in mice: a detailed protocol. *J. Vis. Exp.* 50556. <https://doi.org/10.3791/50556>.
75. Cheng, C.-H., Lee, C.-F., Fryer, M., Furtmüller, G.J., Oh, B., Powell, J.D., and Brandacher, G. (2017). Murine full-thickness skin transplantation. *J. Vis. Exp.* 55105. <https://doi.org/10.3791/55105>.
76. Stuart, T., Butler, A., Hoffman, P., Hafemeister, C., Papalexi, E., Mauck, W.M., Hao, Y., Stoeckius, M., Smibert, P., and Satija, R. (2019). Comprehensive integration of single-cell data. *Cell* 177, 1888–1902.e21. <https://doi.org/10.1016/j.cell.2019.05.031>.
77. Legoux, F., Bellet, D., Daviaud, C., El Morr, Y., Darbois, A., Niort, K., Procopio, E., Salou, M., Gilet, J., Ryffel, B., et al. (2019). Microbial metabolites control the thymic development of mucosal-associated invariant T cells. *Science* 366, 494–499. <https://doi.org/10.1126/science.aaw2719>.
78. Burns, D.L. (1988). Subunit structure and enzymic activity of pertussis toxin. *Microbiol. Sci.* 5, 285–287.



STAR★METHODS

KEY RESOURCES TABLE

| REAGENT or RESOURCE                                                                    | SOURCE                            | IDENTIFIER                       |
|----------------------------------------------------------------------------------------|-----------------------------------|----------------------------------|
| <b>Antibodies</b>                                                                      |                                   |                                  |
| <b>Antibodies for Cytometry</b>                                                        |                                   |                                  |
| Amphiregulin (Biot)                                                                    | R&D system                        | Cat#BAF989; RRID: AB_2060662     |
| Aqua L/D                                                                               | ThermoFisher                      | Cat#L34957                       |
| B220 (AF700)                                                                           | eBioscience                       | Cat#56-0452-82; RRID: AB_891458  |
| CCR2 (AF700)                                                                           | R&D system                        | Cat#FAB5538N; RRID: AB_2725739   |
| CD103 (BV786)                                                                          | BD                                | Cat#564322; RRID: AB_2738744     |
| CD103 (PerCP-eF710)                                                                    | Invitrogen                        | Cat#46-1031-82; RRID: AB_2573704 |
| CD11b (APC)                                                                            | eBiosciences                      | Cat#17-0112-83; RRID: AB_469344  |
| CD11c (PETR)                                                                           | LifeTechnologies                  | Cat#MCD11C17; RRID: AB_1464845   |
| CD19 (AF700)                                                                           | Biolegend                         | Cat#115528; RRID: AB_493735      |
| CD19 (FITC)                                                                            | eBioscience                       | Cat#11-0191-85; RRID: AB_464966  |
| CD44 (BV605)                                                                           | Biolegend                         | Cat#103047; RRID: AB_2562451     |
| CD45.1 (PE-Cy7)                                                                        | Biolegend                         | Cat#110730; RRID: AB_1134168     |
| CD45.2 (AF700)                                                                         | Biolegend                         | Cat#109822; RRID: AB_493731      |
| CD24 (FITC)                                                                            | Invitrogen                        | Cat# 11-0242-82; RRID: AB_464988 |
| CD69 (PC7 & PE-Dazzle 594)                                                             | Biolegend                         | Cat#104512; RRID: AB_493564      |
| CXCR6 (PETR)                                                                           | Biolegend                         | Cat#151117; RRID: AB_2721700     |
| Ki67 (PE-Cy7)                                                                          | Biolegend                         | Cat#652426; RRID: AB_2632694     |
| Ly6C (BV785)                                                                           | Biolegend                         | Cat#128041; RRID: AB_2565852     |
| RORgt (BV786)                                                                          | BD                                | Cat#564723; RRID: AB_2738916     |
| Tbet (APC)                                                                             | Invitrogen                        | Cat#17-5825-82; RRID: AB_2744712 |
| TCRb (APC-Cy7)                                                                         | Biolegend                         | Cat#109220; RRID: AB_893626      |
| TCRgd (BV605)                                                                          | Biolegend                         | Cat#118129; RRID: AB_2563356     |
| Tet CD1d (BV421)                                                                       | NIH tetramer core facility        | N/A                              |
| Tet MR1 (APC)                                                                          | NIH tetramer core facility        | N/A                              |
| Tet MR1 (PE)                                                                           | NIH tetramer core facility        | N/A                              |
| <b>Antibodies for Immunohistochemistry and Immunofluorescence</b>                      |                                   |                                  |
| DAPI                                                                                   | Sigma                             | Cat#MBD0015                      |
| Donkey anti-Rabbit IgG (H+L) Highly Cross-Adsorbed Secondary Antibody, Alexa Fluor 488 | Fisher                            | Cat#A-21206; RRID: AB_2535792    |
| Goat anti-Chicken IgY (H+L) Cross-Adsorbed Secondary Antibody, Alexa Fluor Plus 647    | Fisher                            | Cat#A32933; RRID: AB_2762845     |
| Goat anti-Rat IgG (H+L) Cross-Adsorbed Secondary Antibody, Cyanine3                    | Fisher                            | Cat#A10522; RRID: AB_1500704     |
| Keratin 14 Polyclonal Chicken Antibody, Purified Antibody                              | Biolegend                         | Cat#905301; RRID: AB_2565048     |
| Ki-67 (D3B5) Rabbit mAb                                                                | Ozyme                             | Cat#9129S; RRID: AB_2687446      |
| Purified Chicken IgY Isotype Ctrl Antibody                                             | BIOLEGEND                         | Cat#402101                       |
| Purified Rat Anti-Mouse CD31                                                           | BD                                | Cat#550274; RRID: AB_393571      |
| Purified Rat IgG2a κ Isotype Control                                                   | BD                                | Cat#559073; RRID: AB_479682      |
| Rabbit (DA1E) mAb IgG XP® Isotype Control                                              | Ozyme                             | Cat#3900S; RRID: AB_1550038      |
| <b>Chemicals, peptides, and recombinant proteins</b>                                   |                                   |                                  |
| 24G2                                                                                   | Institut Curie, produced in house | N/A                              |
| Alt-R S.p. HiFi Cas9 Nuclease V3                                                       | IDT                               | Cat#1081061                      |
| Anti-mCXCL16                                                                           | R&D Systems                       | Cat#MAB503; RRID: AB_2276752     |

(Continued on next page)

**Continued**

| REAGENT or RESOURCE                                | SOURCE                    | IDENTIFIER                  |
|----------------------------------------------------|---------------------------|-----------------------------|
| Anti-PE microbeads                                 | Miltenyi                  | Cat#130-048-801             |
| Anti-FITC microbeads                               | Miltenyi                  | Cat# 130-048-701            |
| B-mercaptoethanol                                  | Sigma                     | Cat#M3148                   |
| BCA Assay                                          | ThermoFisher              | Cat#23227                   |
| Bovine Serum Albumin                               | SIGMA                     | Cat#A7906                   |
| Brefeldin A                                        | SIGMA                     | Cat#B6542                   |
| CO2 independent medium                             | Gibco                     | Cat#18045088                |
| DAPI                                               | Sigma                     | Cat#MBD0015                 |
| Debris removal solution                            | Miltenyi                  | Cat#130-109-398             |
| Dispase                                            | Corning                   | Cat#354235                  |
| DNase 1                                            | Roche                     | Cat#5401020001              |
| EDTA                                               | Gibco                     | Cat#15575-038               |
| Fetal Calf Serum                                   | Eurobio                   | Cat#CVFSVF00-01             |
| Fluorescent Mounting Medium                        | Dako                      | Cat#53023                   |
| FTY-720                                            | Sigma                     | Cat#SML0700-25mg            |
| gelatine from cold water fish skin                 | Sigma                     | Cat#67765                   |
| GolgiPlug                                          | BD                        | Cat#555029                  |
| GolgiStop                                          | BD                        | Cat#554724                  |
| HEPES                                              | Gibco                     | Cat#15630-056               |
| Liberase TL                                        | Sigma                     | Cat#10104159001             |
| Live and Dead AQUA                                 | Thermo Fischer Scientific | Cat#L34957                  |
| LS columns                                         | Miltenyi                  | Cat#130-042-401             |
| Maristamat                                         | Sigma                     | Cat#M2699                   |
| Monensin                                           | Invitrogen                | Cat#00-4505-51              |
| Non-essential amino acid                           | ThermoFisher              | Cat#11140050                |
| OCT                                                | Tissue-Tek                | Cat#16-004004               |
| Paraformaldehyde                                   | EMS                       | Cat#15710                   |
| PBS                                                | Eurobio scientific        | Cat#CS1PB501-01             |
| Penicillin/Streptomycin                            | Gibco                     | Cat#15140-122               |
| Pertussis Toxin                                    | Gibco                     | Cat#PHZ1174                 |
| Protease inhibitors                                | Roche                     | Cat#11697498001             |
| Rat IgG2A Isotype Control                          | R&D Systems               | Cat#MAB006; RRID: AB_357349 |
| RBC lysis buffer                                   | Biolegend                 | Cat#420302                  |
| RPMI 1640 GlutaMAX                                 | Gibco                     | Cat#61870036                |
| skim milk powder                                   | Régilait                  | Cat#B0110287                |
| Sodium Chloride                                    | VWR Chemicals             | Cat#27810-295               |
| Sodium Pyruvate (NaPyr)                            | ThermoFisher              | Cat#11360070                |
| Triton X-100                                       | Sigma                     | Cat#11332481001             |
| Tween                                              | Sigma                     | Cat#P9416                   |
| 5-OP-RU                                            | Curie Institute           | Soudais et al., 2015        |
| <b>Critical commercial assays</b>                  |                           |                             |
| Cytofix/Cytoperm Solution Kit                      | BD                        | Cat#554714                  |
| FoxP3 Transcription factor Permeabilization buffer | Thermofischer             | Cat#00-5523-00              |
| mrmIL-2                                            | Peptotech                 | Cat#212-12                  |
| rmIL-18                                            | R&D                       | Cat# 9139-IL                |
| Proteome array                                     | R&D                       | Cat#ARY028                  |
| Solution P3 Primary Cell 4DNucleofector X kit S    | Lonza                     | Cat#VAXP-3032               |

(Continued on next page)

| REAGENT or RESOURCE                                                                                                                                 | SOURCE                                        | IDENTIFIER                                                                                                                                                                                                  |
|-----------------------------------------------------------------------------------------------------------------------------------------------------|-----------------------------------------------|-------------------------------------------------------------------------------------------------------------------------------------------------------------------------------------------------------------|
| <b>Continued</b>                                                                                                                                    |                                               |                                                                                                                                                                                                             |
| <b>Deposited data</b>                                                                                                                               |                                               |                                                                                                                                                                                                             |
| Skin single cell datasets                                                                                                                           | This paper                                    | GSE207348 <sup>69</sup>                                                                                                                                                                                     |
| Thymic single cell dataset                                                                                                                          | Legoux et al. <sup>24</sup>                   | E-MTAB-7704                                                                                                                                                                                                 |
| <b>Experimental models: Organisms/strains</b>                                                                                                       |                                               |                                                                                                                                                                                                             |
| B6 <i>Areg</i> <sup>flox/flox</sup> ( <i>Areg</i> <sup>tm2a(EUCOMM)Hmgv</sup> )                                                                     | Bred in Institut Curie - provided by D. Zaiss | Minutti et al. <sup>70</sup>                                                                                                                                                                                |
| <i>Zbtb16</i> -GFPcre                                                                                                                               | Institut Curie                                | Constantinides et al. <sup>54</sup>                                                                                                                                                                         |
| <i>Cd3e</i> <sup>-/-</sup> <i>Mr1</i> <sup>+/+</sup> and <i>Mr1</i> <sup>-/-</sup>                                                                  | Institut Curie                                | Malissen et al. <sup>71</sup>                                                                                                                                                                               |
| CD45.1/1 and CD45.1/2 B6-MAIT <sup>CAST</sup>                                                                                                       | Institut Curie                                | N/A                                                                                                                                                                                                         |
| CD45.2/2 B6-MAIT <sup>CAST</sup> <i>Mr1</i> <sup>+/+</sup> or <i>Mr1</i> <sup>-/-</sup>                                                             | Institut Curie                                | Cui et al. <sup>20</sup> and Treiner et al. <sup>22</sup>                                                                                                                                                   |
| Kaede B6                                                                                                                                            | Rachel Golub, Institut Pasteur                | Tomura et al. <sup>40</sup>                                                                                                                                                                                 |
| <i>Nr4a1</i> -GFP B6-MAIT <sup>CAST</sup>                                                                                                           | Institut Curie                                | Zikherman et al. <sup>72</sup>                                                                                                                                                                              |
| <i>Rorc</i> -GFP B6-MAIT <sup>CAST</sup>                                                                                                            | Institut Curie                                | Lochner et al. <sup>73</sup>                                                                                                                                                                                |
| <b>Oligonucleotides</b>                                                                                                                             |                                               |                                                                                                                                                                                                             |
| Alt-R CRISPR-Cas9 crRNA: Mm_CXCR6.1_AA:<br>/AltR1/rCrU rGrUrA rCrGrA rUrGrG rGrCrA<br>rCrUrA rCrGrA rGrUrU rUrUrA rGrArG rCrUrA<br>rUrGrC rU/AltR2/ | IDT                                           | N/A                                                                                                                                                                                                         |
| Alt-R® CRISPR-Cas9 tracrRNA                                                                                                                         | IDT                                           | Cat#1072534                                                                                                                                                                                                 |
| <b>Software and algorithms</b>                                                                                                                      |                                               |                                                                                                                                                                                                             |
| Astrios software (Summit)                                                                                                                           | BECKMAN COULTER (Summit v62)                  | <a href="https://www.beckman.fr/flow-cytometry/cell-sorters/moflo-astrios-eq">https://www.beckman.fr/flow-cytometry/cell-sorters/moflo-astrios-eq</a>                                                       |
| Cytoflex software (CytExpert)                                                                                                                       | BECKMAN COULTER (V2.4)                        | <a href="https://www.beckman.fr/flow-cytometry/research-flow-cytometers/cytoflex/software">https://www.beckman.fr/flow-cytometry/research-flow-cytometers/cytoflex/software</a>                             |
| FlowJo                                                                                                                                              | BD (V10.8.0)                                  | <a href="https://www.flowjo.com/">https://www.flowjo.com/</a>                                                                                                                                               |
| Fortessa software (BD FACSDiva software)                                                                                                            | BD (V6)                                       | <a href="https://www.bdbiosciences.com/en-eu/products/software/instrument-software/bd-facsdiva-software">https://www.bdbiosciences.com/en-eu/products/software/instrument-software/bd-facsdiva-software</a> |
| Image J Software                                                                                                                                    | Schneider et al., 2012                        | <a href="https://imagej.nih.gov/ij/">https://imagej.nih.gov/ij/</a>                                                                                                                                         |
| Prism                                                                                                                                               | GraphPad (V8)                                 | <a href="https://www.graphpad.com/scientific-software/prism/">https://www.graphpad.com/scientific-software/prism/</a>                                                                                       |
| <b>Other</b>                                                                                                                                        |                                               |                                                                                                                                                                                                             |
| Astrio                                                                                                                                              | BECKMAN COULTER                               | Cat#B25982                                                                                                                                                                                                  |
| Biopsy punch (4Ø)                                                                                                                                   | Stiefel                                       | Cat#600210                                                                                                                                                                                                  |
| ChemiDoc Imaging System                                                                                                                             | BIORAD                                        | Cat#17001402                                                                                                                                                                                                |
| Chromium 3' Chip                                                                                                                                    | 10X Genomics                                  | N/A                                                                                                                                                                                                         |
| Cryostat                                                                                                                                            | LEICA                                         | Cat#CM1950                                                                                                                                                                                                  |
| Cytoflex LX                                                                                                                                         | BECKMAN COULTER                               | Cat#C00445                                                                                                                                                                                                  |
| Fortessa LSR                                                                                                                                        | BD                                            | Cat#23-11617-01                                                                                                                                                                                             |
| Hair removal cream                                                                                                                                  | Veet                                          | Cat#EA_3108955                                                                                                                                                                                              |
| Microscope pour immunostaining                                                                                                                      | ThermoFischer                                 | Cat#EVOS_M500                                                                                                                                                                                               |
| Silicone sheet (5mm thick)                                                                                                                          | Grace Bio-Labs                                | Cat#GBL664581-5EA                                                                                                                                                                                           |

## RESOURCE AVAILABILITY

### Lead contact

Further information and requests for resources and reagents should be directed to and will be fulfilled by the lead contact, Marion Salou ([marion.salou@curie.fr](mailto:marion.salou@curie.fr)).

### Materials availability

This study did not generate new unique reagents.

### Experimental model and subject details

Unless specified otherwise, congenic B6-MAIT<sup>CAST</sup> strain, on an *Mr1*<sup>+</sup> or *Mr1*<sup>-/-</sup> background were used in this study.<sup>20</sup> Reporter genes under the control of *Rorc* (ROR $\gamma$ t),<sup>73</sup> *Nr4a1* (Nur77)<sup>72</sup> or *Zbtb16* (PLZF)<sup>54</sup> promoters were introgressed into the B6-MAIT<sup>CAST</sup> background. CD45.1/1, CD45.1/2, CD45.2/2 animals were generated by crossing CD45.1/1 B6 animals onto CD45.2/2 B6-MAIT<sup>CAST</sup> mice. Photoconvertible Kaede mice were generously provided by R. Golub (Institut Pasteur, Paris).<sup>40</sup> *Mr1*<sup>+/+</sup> and *Mr1*<sup>-/-</sup> *Cd3e*<sup>-/-</sup> mice were generated in house by crossing MR1 on a B6 background with *Cd3e*<sup>-/-</sup> mice.<sup>71</sup> *B6 Areg*<sup>flx/flx</sup> (*Areg*<sup>tm2a(EUCOMM)Hmguy</sup>)<sup>70</sup> provided by D. Zaiss were crossed onto B6-MAIT<sup>CAST</sup> *Zbtb16*<sup>GFPcre</sup> mice.<sup>5</sup> In all experiments, we accounted for the cage effect on immune cell population (e.g., MAIT cell frequency impacted by microbiota composition)<sup>5</sup> by spreading animals and/or litters from the same breeding cages into the different experimental groups. All experiments were conducted in an accredited animal facility by the French Veterinarian Department following ethical guidelines approved by the relevant ethical committee (APAF1S no. 24245–2020021921558370-v1).

### Method details

Skin excision was performed as previously described.<sup>21</sup> Briefly, after shaving and depilation, a 4 mm full-thickness wound was performed on the back of the mouse using a biopsy punch. Silicone rings were then sutured to prevent epithelial skin contraction. A clean dressing was applied and regularly changed to avoid infection of the wounds. Macroscopic measurements were performed on pictures by calculating wound and ring areas using ImageJ. Wound size was then estimated as a wound to ring area ratio, with 1 being an open wound and 0 a fully closed wound.

### Parabiotic surgery

Aged-matched congenically distinct B6-MAIT<sup>CAST</sup> mice either *Mr1*<sup>+/+</sup> or *Mr1*<sup>-/-</sup> were co-housed for a minimum of 2 weeks before being surgically joined as parabiotic pairs as previously described.<sup>15,74</sup> Skin and lungs were collected 5 weeks later.

### Skin graft

Graft surgery was performed as described.<sup>75</sup> Briefly, either *Mr1*<sup>+/+</sup> or *Mr1*<sup>-/-</sup> B6-MAIT<sup>CAST</sup> donor skin was collected. A 2 cm<sup>2</sup> sample was grafted onto congenically distinct *Mr1*<sup>+/+</sup> B6-MAIT<sup>CAST</sup> mice. Recipients with grafts from identical donors were sacrificed at different time points to follow cellular infiltration kinetics.

### Kaedes photoconversion

Mice were anesthetized, shaved on the dorsal side, and exposed to violet light (395nm U.V. light 95 Watts for 60s)<sup>40</sup> to photoconvert skin cells.

### Tissue processing

Back skin was shaved, depilated (2 min of hair removal cream, Veet) and full-thickness samples (ie dermis and epidermis) were collected in CO<sub>2</sub> independent medium (Gibco). The following area were sampled: steady state skin, wound site (1 cm<sup>2</sup> encompassing the wound and surrounding rims, meaning that the wound represents 12.6% of the sampled skin, back top left of the mouse) or contralateral control skin (1 cm<sup>2</sup> of skin at the contralateral side as compared to the wound, i.e. back top right). The contralateral site called control is used to normalize the number of MAIT cells present in the wound to account for inter-individual variations.<sup>5</sup>

Skin single cell suspensions were obtained by putting the samples (flattened, epidermis side up) at 37°C for 45 min in 1 mL of 500 CU Dispase (Corning). The skin sample was then chopped in RPMI 1640 GlutaMAX media supplemented with 1 mM sodium pyruvate, 1 mM non-essential amino acids, 50  $\mu$ M  $\beta$ -mercaptoethanol, 20 mM HEPES, 100 U/mL penicillin, 100 mg/mL streptomycin, 0.5 mg/mL DNase I (all products from Sigma-Aldrich), and 0.25 mg/ml Liberase TL (Roche) and incubated for 1h45 min at 37°C in a 5% CO<sub>2</sub> incubator. After filtering on a 40  $\mu$ m filter and 2 washing in PBS, BSA 0.5%, 2 mM EDTA, the cell suspension was removed of skin debris using the cell debris removal solution (Miltenyi) following manufacturer's instructions.

Lung single cell suspensions were obtained as described.<sup>15</sup> Blood cells were recovered by centrifugation after red blood cell lysis (Biolegend). LNs were scratched onto 40 $\mu$ m filter and cells were washed in PBS 1x, BSA 0.5%, 2mM EDTA before use.

### Flow cytometry

Extracellular staining was performed with the relevant titrated antibodies in staining buffer (PBS 0.5% BSA, 2 mM EDTA and anti-FcR 2.4G2 produced in house) for 20 min at 4°C. Staining for transcription factors or cytokines was performed on fixed and permeabilized cells using the appropriate kits (Foxp3 Fixation kit (ThermoFisher) and BD Fix/Perm kit, respectively) as per manufacturer instructions, followed by 20 min incubation at 4°C with the relevant titrated antibodies. If needed, tetramer staining was performed before the extracellular staining step, for 30 min at room temperature in staining buffer containing MR1 tetramers loaded with 5-OP-RU or 6-FP with or without CD1d tetramers loaded with PBS-57 (both tetramers from the NIH Tetramer Core Facility; Emory University, GA) and anti-TCR $\beta$ . Flow cytometry acquisition was performed on a Cytotflex (Beckman) or Fortessa cytometer (BD). FACS was performed on an Astrios cell sorter (Beckman Coulter). Data were analyzed using FlowJo software.



### Ex vivo amphiregulin production

Brefeldin A (Sigma) was injected i.v.<sup>70</sup> 6 hours before sacrifice. Skin was processed as described above, except for addition of Monensin (10  $\mu$ M, Invitrogen) in every buffer. To prevent extracellular secretion the resulting single cell suspension was maintained for 3h at 37°C with maristamat (10 mM, Sigma), GolgiPlug (1/1000; BD) and GolgiStop (1/1500; BD)<sup>33</sup> before staining.

### Single cell RNA sequencing

Single cell suspensions of 18 wounds (1 cm<sup>2</sup>) or steady state back skin (same location as the wound) were pooled together and live TCR $\beta$ <sup>+</sup>MR1:5-OP-RU<sup>+</sup> were isolated by Aria cell sorter (BD) in 10% FCS CO<sub>2</sub>-independent medium. 7,000 cells for each sample were loaded onto a chromium 3' chip following the Single Cell 3' Kit V3 (10X Genomics). Generation and acquisition of the sequencing reads were performed according to the manufacturer recommendations (10X Genomics) by the ICGex NGS platform of the Institut Curie.

### Single cell RNA-seq preprocessing

The reads were aligned and feature-barcode matrices were generated using the Cell ranger pipeline version 3.1.0. The reference genome used is the mm10-3.0.0.

### Single cell RNA analysis

All analyses were performed using R version 4.1.0 and the following packages: Seurat\_4.1.0, clustree\_0.4.4, ggplot2\_3.3.5 and dplyr\_1.0.8. Based on the distribution of the numbers of genes and molecules detected per cell, the following filters were applied to remove outliers: nFeature\_RNA > 1,200 & nCount\_RNA > 3,500 & nCount\_RNA < 25,000 for the control site, and nFeature\_RNA > 1,200 & nCount\_RNA > 3,000 & nCount\_RNA < 33,000 for the wound site, respectively. Cells containing more than 15% of mitochondrial genes were considered as dying cells and filtered out. Following preliminary analyses, some contaminating cells representing less than 0.15% of the total cells were removed, based on the expression of either F4/80, CD11b, CD11c, CD64, CD20 or CD206. The thymic dataset<sup>24</sup> was filtered based on the following arguments: nFeature\_RNA > 800 & nCount\_RNA < 22,000 and less than 10% of mitochondrial genes. The cells with C1qc expression (more than 0.01%) were also removed. In summary, we obtained 3 datasets with comparable cell numbers (3,937 for skin distal, 4,368 for skin wound and 3,428 for thymus) and median number of features (2,458 for skin distal, 2,439.5 for skin wound and 1,812 for thymus).

All three datasets were integrated together using the corresponding Seurat vignette.<sup>76</sup> The variable features number was set to 2,000 for the skin datasets and encompassed *Tbx21* and *Mki67*. Given that most MAIT cells in the skin are MAIT17 cells, neither *Rorc* nor *Zbtb16* were present in the VariableFeatures lists. This number was raised to 2500 for the thymus, to encompass *Rorc* and *Zbtb16*. Following normalization of each dataset and linear transformation (ScaleData), the anchors were identified using the default parameters, except the number of Integration Features which was raised to 4000 to encompass *Zbtb16* and *Rorc*. The data were then integrated. A principal component analysis was run, and the number of principal components to use for downstream clustering (n=25) was determined as proposed in the Seurat Vignette ([https://satijalab.org/seurat/articles/pbmc3k\\_tutorial.html](https://satijalab.org/seurat/articles/pbmc3k_tutorial.html)). Graph-based clustering (Louvain) was performed using the default parameters, and a UMAP (dims=25) was constructed with a resolution of 0.4 based on the stability observed with the package clustree. The differentially expressed genes were determined using the FindAllMarkers() function (using a logistic regression, test.use = "LR", and testing the effect of the dataset, latent.vars = "orig.ident" to correct for the batch effect). The same analysis was performed to determine the genes specific for the skin datasets, after sub-setting the non-cycling MAIT17 cells (FindMarkers()). The signatures used throughout the analysis were gene lists from the literature<sup>15,23,25,32–36,77</sup> and are presented in Table S1.

### Migration inhibition protocols (FTY20, Pertussis toxin and $\alpha$ -CXCL16 treatments)

FTY720 (Sigma) 0.5 mg/kg or PBS alone was injected daily from the day prior to skin excision, until organ collection.<sup>42</sup> Pertussis toxin<sup>78</sup> treatment (1  $\mu$ g in 100  $\mu$ l i.p., Gibco) was performed one day prior to skin excision and daily until organ collection. *In vivo* CXCL16 blocking was done by injecting i.p. 100  $\mu$ g of anti-CXCL16 antibody or 100  $\mu$ g of IgG isotype (R&D Systems) one day prior to skin excision and daily until organ collection.

### MAIT expansion and adoptive transfer

Thymic single-cell suspensions were obtained by mechanical dissociation through a 40  $\mu$ m cell strainer. Cells were first incubated with MR1:6FP tetramer to avoid unspecific staining, stained using MR1:5-OP-RU-PE tetramer. Enrichment by positive selection on LS columns (Miltenyi) was performed after staining the cells with anti-PE microbeads (Miltenyi).

$2 \times 10^6$  cells/mL were plated in complete RPMI 1640 media (10% FCS, 100U Penicillin/Streptomycin, 10 mM Hepes, 1 mM Sodium Pyruvate, 1X Non-essential Amino Acid, 50  $\mu$ M  $\beta$ -mercaptoethanol) and stimulated with 150 nM 5-OP-RU and 10 ng/mL of rmlL-2 (Peprotech). MAIT cells were expanded for 10 to 15 days by addition of rmlL-2 (every 2 days) before adoptive transfer or genetic manipulation.

### CXCR6 CRISPR-Cas9 genetic targeting

To create a CXCR6-specific RNP complex, oligos crRNA\_CXCR6\_AA (100 pmole) and tracrRNA (100 pmole) were first annealed using a slow ramp reaching 23°C and incubated at room temperature 10 min with 10  $\mu$ g S.p Hifi Cas9 Nuclease V3. 2.106 (all reagents

from IDT). Expanded MAIT cells were transfected according to the manufacturer instruction (Lonza). Briefly,  $2 \times 10^6$  cells were resuspended in nucleofection solution (Lonza) with 3  $\mu$ l RNP complex, transferred to nucleofection cuvette strips, electroporated using the DN110 program (4D-Nucleofector Core Unit: Lonza, AAF-1002B) and incubated in complete RPMI 1640 media at 32 °C for 24 hours to force non homologous repair recombination. Transfected cells were further cultured for 2-3 days before transfer. The efficiency of *Cxcr6* deletion was evaluated for each experiment on the day of injection by flow-cytometry.

### Proteome array

Skin samples (1 cm<sup>2</sup>) were chopped in PBS containing 1% Triton and protease inhibitors, flash-frozen, and then thawed before scratching on a 40  $\mu$ m filter and centrifugation at 14,000 g for 5 min. 200  $\mu$ g (as determined by BCA assay from ThermoFisher), of each sample was then added to each blot following manufacturer's instruction (R&D). Blots were imaged using the ChemiDoc imaging system (BIORAD). The resulting pixel densities of the protein immune-blot dots were quantified with image J (NIH) following manufacturer's instruction (R&D). Two measurements from each sample were obtained and the pair of duplicate spots was averaged, each Mr1<sup>+/+</sup> average values was then divided by the average of Mr1<sup>-/-</sup> duplicates.

### Immunostaining

Wounds were embedded in OCT (Tissue-Tek) and stored at -80°. Five  $\mu$ m OCT sections were cut using a Cryostat (LEICA). For each skin sample, Hematoxylin and eosin staining was used to determine the middle of the wound, given by the distance between first visible hair follicles on each side of the open wound. All immunostainings were done no more than 5 sections away (25  $\mu$ m) from that center. Sections were air-dried for 10 min and fixed with 4% paraformaldehyde (EMS) for 5 min. Sections were washed 3 times in PBS 0.05% Tween and then blocked for one hour in permeabilization and blocking (PB) buffer (0.5% skim milk powder, 0.25% gelatine from cold water fish skin, 0.5% Triton X-100, 20 mM HEPES, 0.9% NaCl, pH 7.2 (all reagents from Sigma-Aldrich)). Primary antibodies were diluted in PB buffer and incubated overnight at 4°C, washed 3 times in PBS tween (0.05%). Slides were then stained with secondary antibodies for 1h at room temperature, washed 3 times in PBS tween (0.05%), stained with DAPI (Sigma), washed twice in PBS tween (0.05%), mounted with fluoromount (DAKO) and imaged using an EVOS-M500 microscope (ThermoFisher). Primary antibodies were used as follows: rabbit anti-K14 (1:1000; Biolegend), rabbit anti-mouse Ki67 (1:500; Cell signalling 9129S), rat anti-mouse CD31 (1:100; BD Biosciences) or isotypes. Alexa Fluor-conjugated antibodies (ThermoFisher Scientific) were used at 1:1000 as secondary antibodies.

### Thymic MAIT cell *in vitro* activation

Thymic single-cell suspensions were obtained by mechanical dissociation through a 40  $\mu$ m cell strainer. Enrichment in mature cells (CD24<sup>-</sup>) was achieved by negative selection using LS columns (Miltenyi) after staining the cells with anti-CD24-FITC antibody (Invitrogen) and anti-FITC microbeads (Miltenyi).  $1 \times 10^6$  cells/mL were plated for 36h in complete RPMI 1640 media (10% FCS, 100 U Penicillin/Streptomycin, 10 mM Hepes, 1 mM Sodium Pyruvate, 1X Non-essential Amino Acid, 50  $\mu$ M  $\beta$ -mercaptoethanol) alone or with addition of 5-OP-RU (1.5  $\mu$ M, 5-OP-RU synthesised in house) or of rmlL18 (10 ng/mL, R&D).

### Quantification and statistical analysis

For each experiment, number of independent experiments, replicates and the statistical tests used are indicated in the figure legends. The following statistical test were used and calculated by GraphPad Prism v8 (GraphPad): Mann-Whitney, Wilcoxon, unpaired t-test, paired t test, Sidák's multiple comparison test, Tukey's multiple comparison test (with p values: \*p<0.05; \*\*p<0.01; \*\*\*p<0.001 and \*\*\*\*p<0.0001 and "ns" if the comparison was non-significant).

### Data and code availability

The data discussed in this publication have been deposited in NCBI's Gene Expression Omnibus and are accessible through GEO Series accession number GSE207348 (<https://www.ncbi.nlm.nih.gov/geo/query/acc.cgi?acc=GSE207348>).

**Supplemental information**

**Role of MR1-driven signals and amphiregulin  
on the recruitment and repair function  
of MAIT cells during skin wound healing**

**Anastasia du Halgouet, Aurélie Darbois, Mansour Alkobtawi, Martin Mestdagh, Aurélia Alphonse, Virginie Premel, Thomas Yvorra, Ludovic Colombeau, Raphaël Rodriguez, Dietmar Zaiss, Yara El Morr, Hélène Bugaut, François Legoux, Laetitia Perrin, Selim Aractingi, Rachel Golub, Olivier Lantz, and Marion Salou**

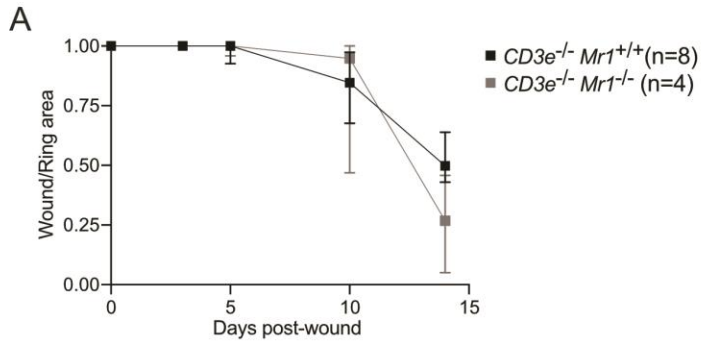

**Fig. S1 related to figure 1: MR1 deficiency alone is not sufficient to delay wound closure.**

Wound surface follow-up in  $Cd3e^{-/-} Mr1^{+/+}$  (black circle) or  $Cd3e^{-/-} Mr1^{-/-}$  (grey square) mice. Pooled data from 2 independent (n=8/4) experiments.



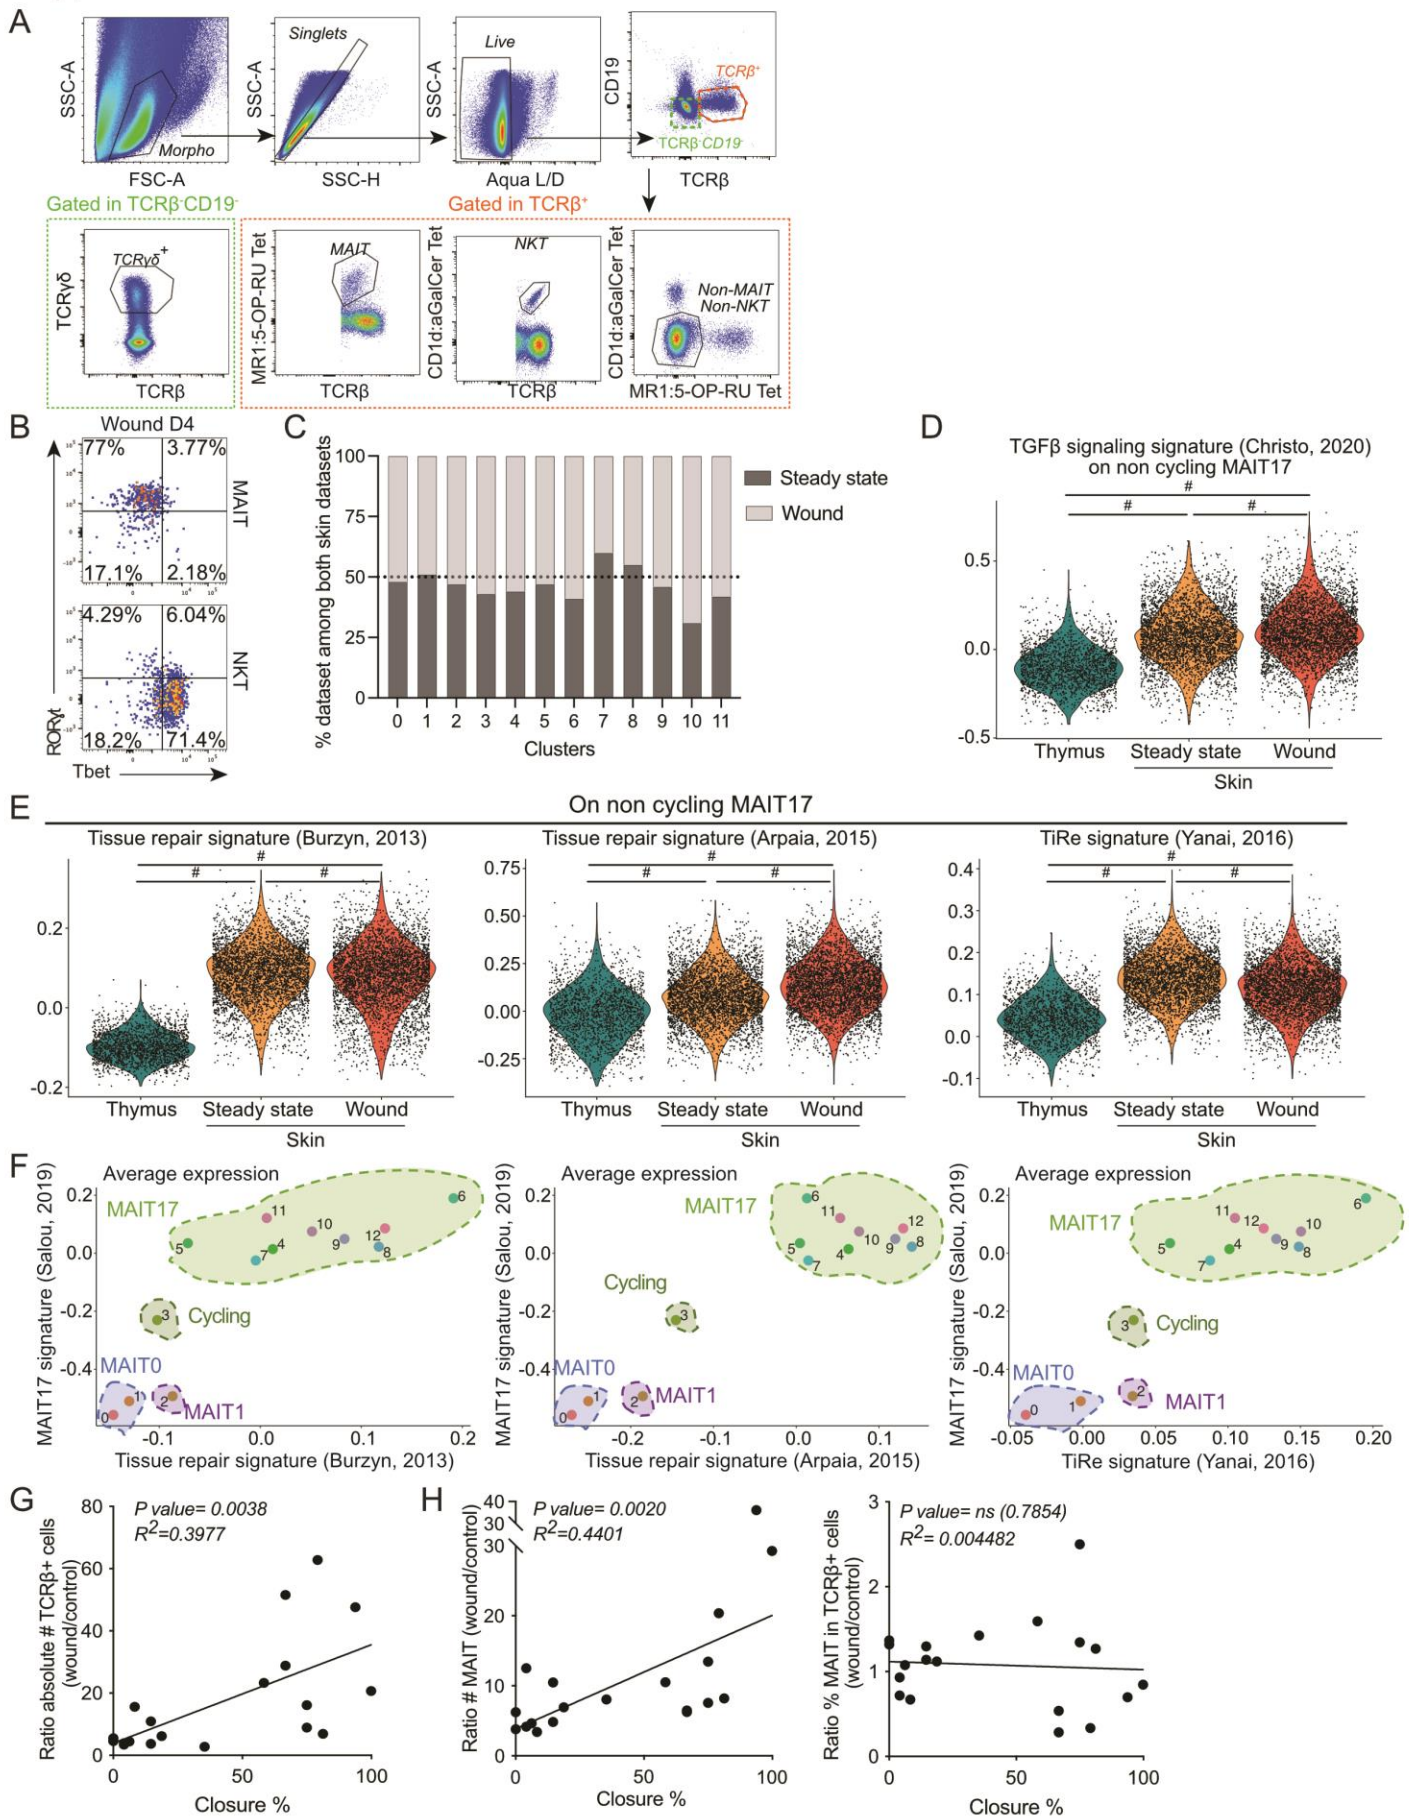

**Fig. S2 related to figure 2**

- (A) Gating strategy used to define MAIT, NKT, non-MAIT non-NKT (mainstream) and  $\gamma\delta$  T cells.
- (B) Flow cytometry example of Tbet and ROR $\gamma$ t intracellular staining on MAIT and NKT cells. *Data are representative of 3 independent experiments (n=8).*
- (C) Distribution of MAIT cells from the wound and steady-state skin in each single cell cluster, among the total number of skin MAIT cells.
- (D) TGF $\beta$  signaling<sup>27</sup> signature score on non-cycling MAIT17 cells. *Tukey's multiple comparison test.*
- (E) Tissue repair signature score as in (D). The signatures are expressed by regulatory T cells producing Areg in the muscle<sup>33</sup> and in the lungs<sup>34</sup>. The 3<sup>rd</sup> one was extracted from the TiRe database<sup>35</sup>. *Tukey's multiple comparison test.*
- (F) Average expression of tissue repair (signatures presented in (E)) and MAIT17<sup>17</sup> signatures in all clusters of the integrated dataset of thymic, wound and steady state skin MAIT cells.
- (G) Correlation between percent of closure and the increase in T cell number in the wound (wound/control site ratio). The line represents the linear regression. *Data are from 6 independent experiments (n=17).*
- (H) Correlation between percent of closure and the increase in MAIT cell number or percent in the wound (wound/control ratio). The lines represent linear regressions. *Data are from 6 independent experiments (n=17).*

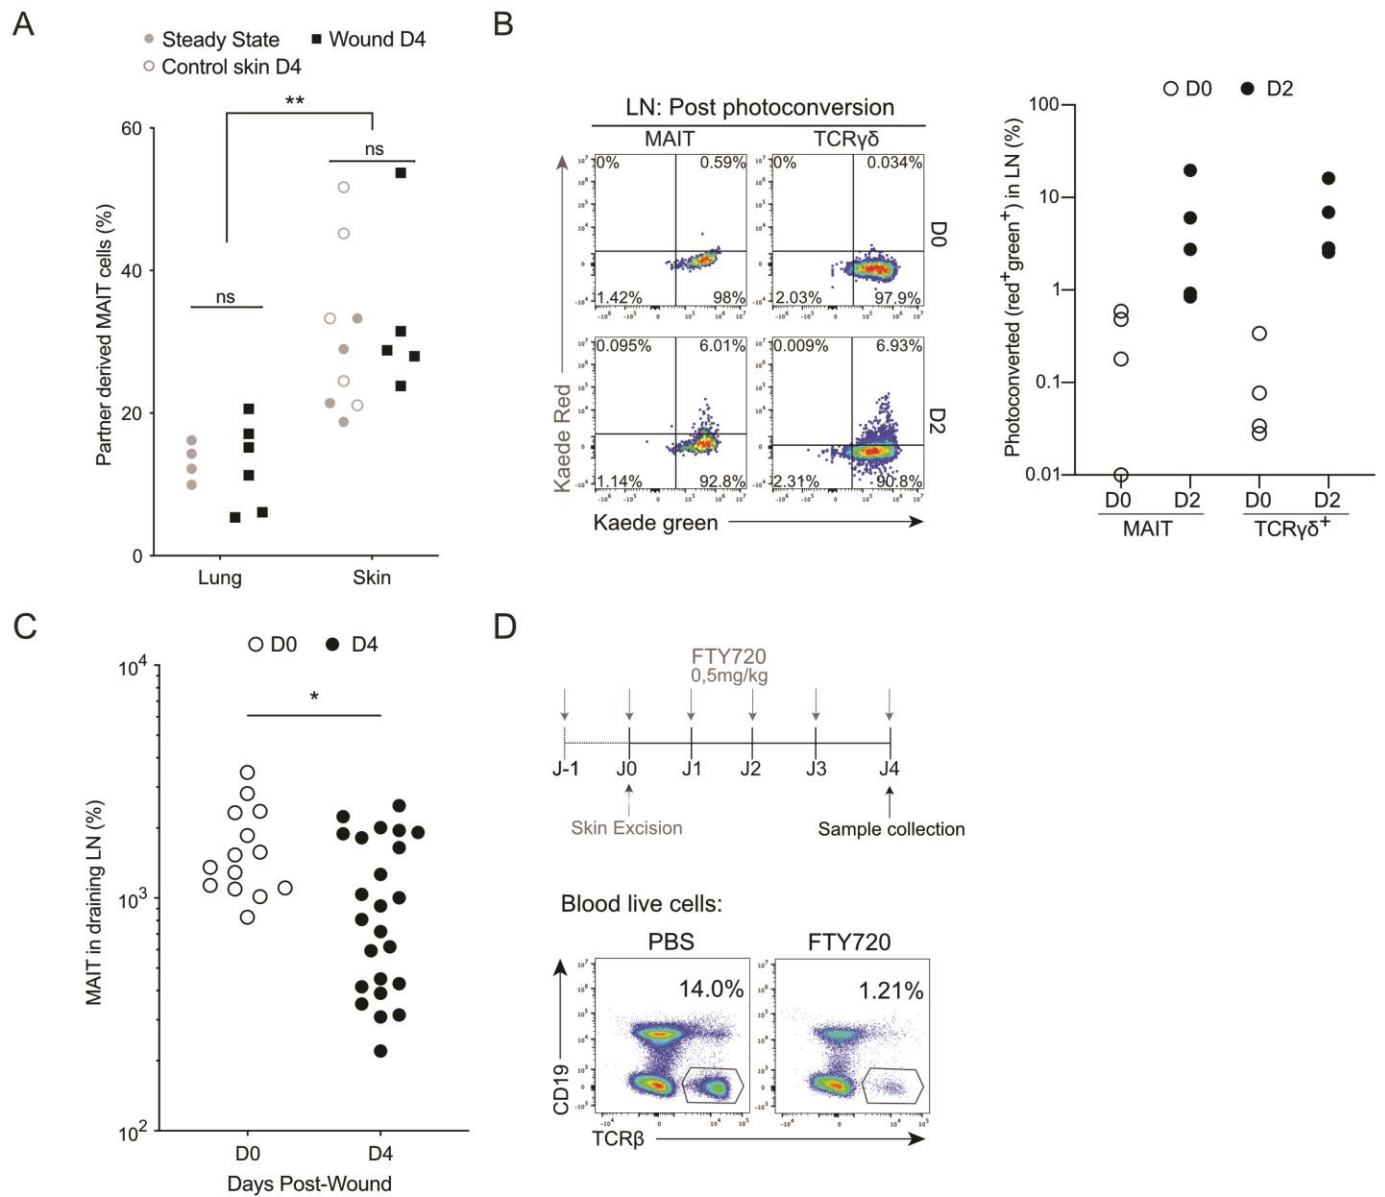

**Fig. S3 related to figure 3: MAIT cells exchange are less resident in the skin than in the lungs and exchange between the skin and the LN.**

- (A) Quantitation of partner-derived MAIT cells in lung and skin, at steady state and four days after excision. Pooled data from 3 ( $n_{\text{steady state+control}}=4/9$ ;  $n_{\text{excision}}=6/5$ ) independent experiments. Sidák's multiple comparison test.
- (B) Example of Kaede Green and Red expression (left) and frequency of photoconverted cells (right) in MAIT and  $\gamma\delta$  T cells from the draining LNs. Pooled data from 2 independent experiments ( $n=5$ ).
- (C) Number of MAIT cells in the draining LNs at steady-state (D0) or four days following excision. Pooled data from 10 independent experiments ( $n_{D0}=14$ ;  $n_{D4}=24$ ). Mann Whitney test.

Experimental setup for FTY720 administration (top). Representative T cell staining in the blood after PBS or FTY720 administration (bottom). Data are representative of 2 independent experiments.

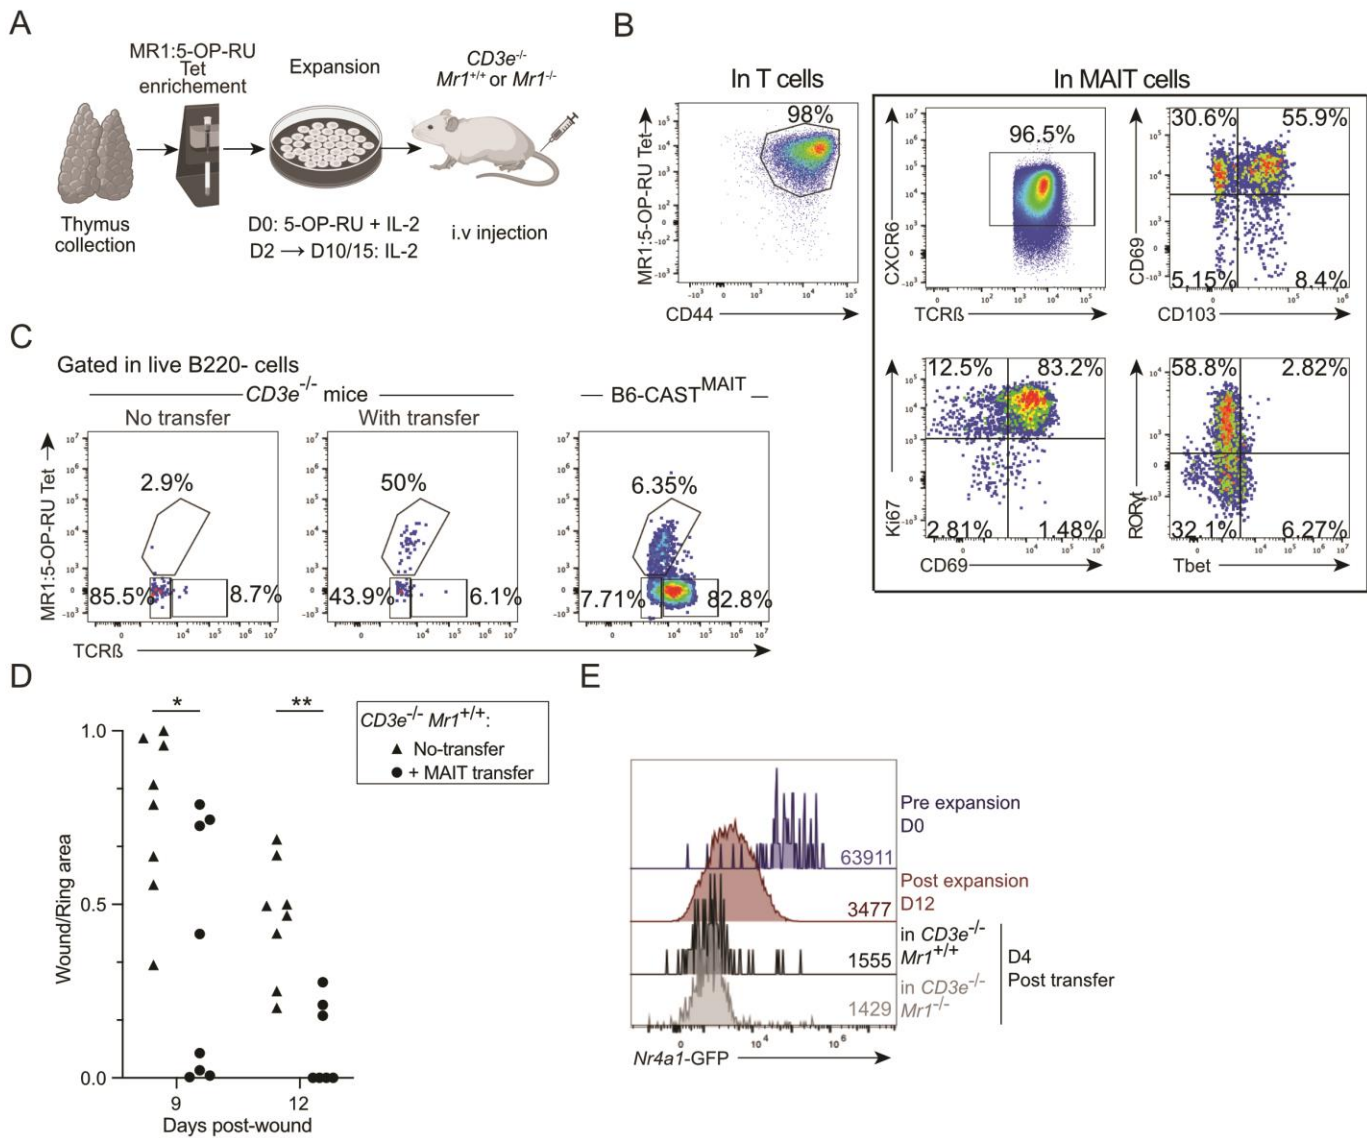

**Fig. S4 related to figure 4: MAIT cell phenotype following in vitro expansion and in-vivo transfer.**

- (A) Experimental cartoon of the thymic MAIT cell expansion protocol (see methods for more details)
- (B) Frequency and phenotype of MAIT cells after expansion. Data are representative of 6 independent experiments.
- (C) Flow cytometry example of MR1:5-OP-RU Tetramer staining in the skin of  $Cd3e^{-/-}$  mice transferred or not with expanded MAIT cells. B6-CAST<sup>MAIT</sup> is presented as control. Data are representative of 2 independent experiments.
- (D) Wound surface (ratio Wound/Ring area) at days 9 and 12 following excision of  $Cd3e^{-/-}$   $Mr1^{+/-}$  mice transferred or not with expanded MAIT cells. Pooled data from 2 independent experiments ( $n=7/8$ ). Mann Whitney tests.
- (E) Thymic MAIT cells from  $Nr4a1$ -GFP were expanded. GFP expression on MAIT cells *ex vivo* in the thymus (blue), after *in vitro* expansion (red) and from the skin of transferred  $Cd3e^{-/-}$   $Mr1^{+/-}$  (black) and  $Cd3e^{-/-}$   $Mr1^{-/-}$  (grey). Data are representative of 2 independent experiments.



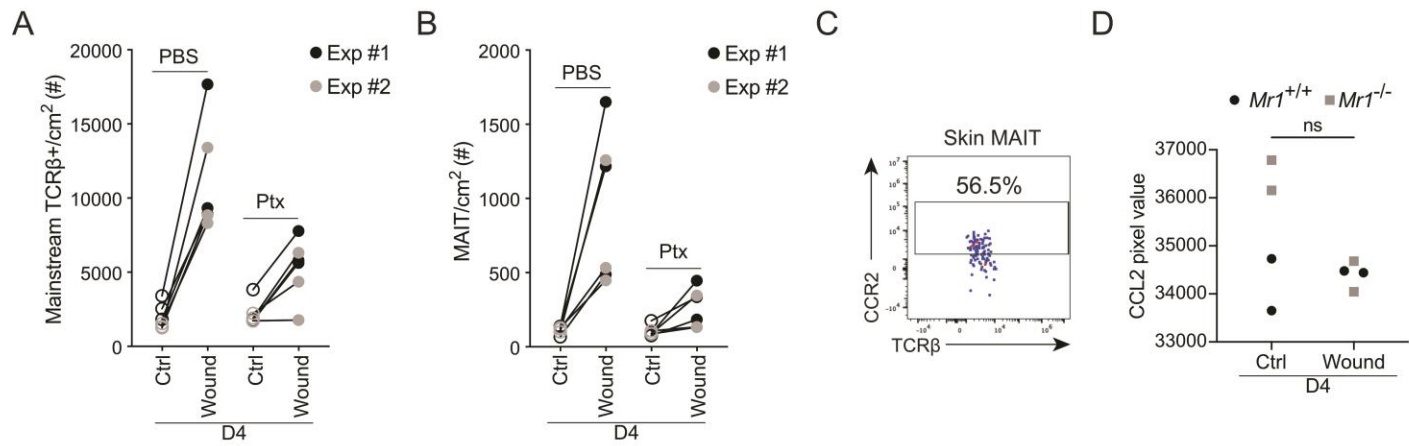

**Fig. S5 related to figure 5**

- (A) Mainstream T cell (TCR $\beta$ <sup>+</sup>MR1:5-OP-RU-Tet<sup>-</sup>CD1d: $\alpha$ GalCer-Tet<sup>-</sup>) numbers (wound/control site) following G protein signaling blocking *in vivo* via Ptx injection. Pooled data from 2 independent experiments (n=6). Unpaired t-test
- (B) Raw numbers for figure 5A.
- (C) Flow cytometry example of CCR2 expression by MAIT cells. Data are representative of 2 independent experiments.
- (D) Quantitation of CCL2 protein expression in total skin lysates from wound and control skin sites of *Mr1*<sup>+/+</sup> and *Mr1*<sup>-/-</sup> mice. Data are from 2 independent experiments (n=4). Mann Whitney test.

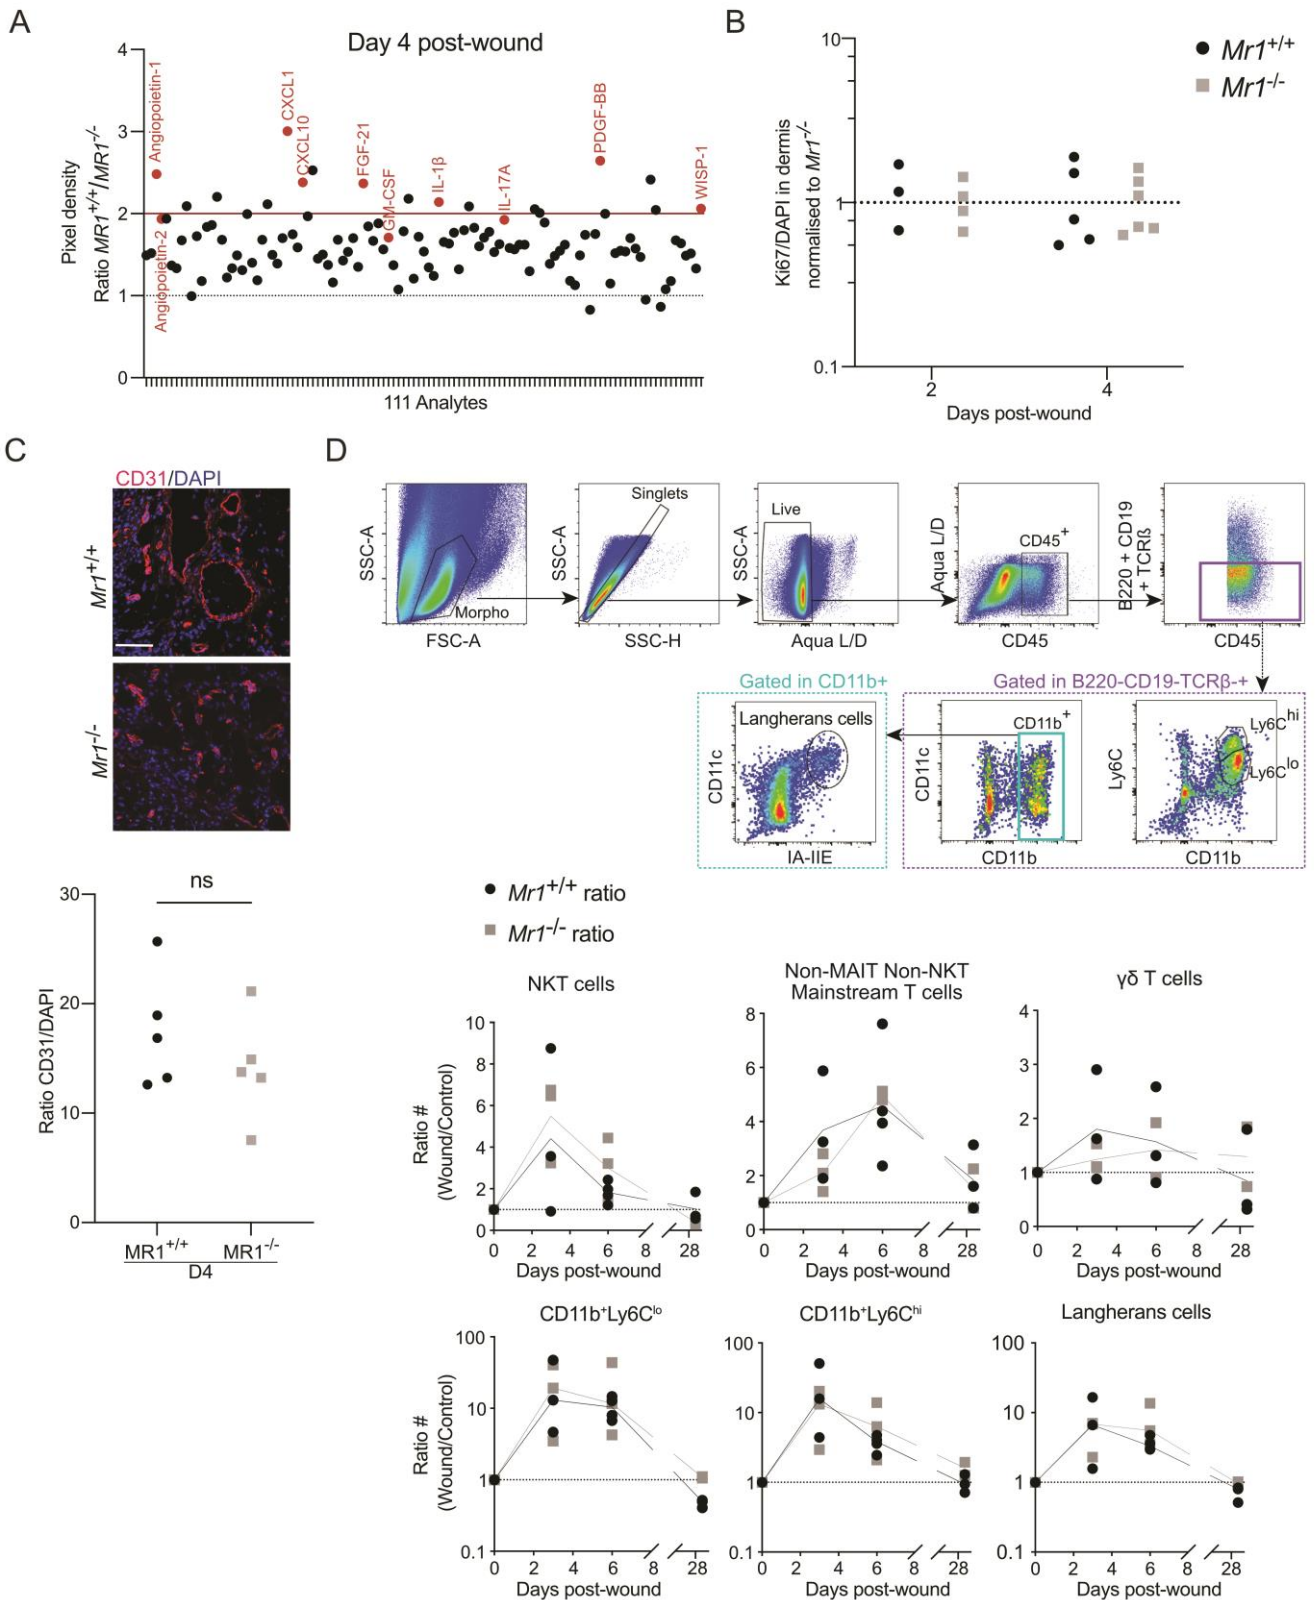

**Fig. S6 related to figure 6: Investigating the potential impact of MAIT cells in the wounds.**

- (A) Protein expression in  $Mr1^{+/+}$  as compared to  $Mr1^{-/-}$  wound (D4) lysates (calculated from pixel density: each  $Mr1^{+/+}$  duplicate was divided by the average of  $Mr1^{-/-}$  duplicates in each independent experiment. Geometric mean is represented). *Pooled data from 2 independent experiments (4  $Mr1^{+/+}$  blots and 3  $Mr1^{-/-}$  blots).*
- (B) Quantitation of proliferation in the dermis by immunofluorescence, given by the Ki67/DAPI ratio and normalized to the average expression in  $Mr1^{-/-}$  wounds for each experiment. *Pooled data from 1 (D2,  $n=3/4$ ) and 2 ( $n=5/6$ ) independent experiments.*
- (C) Representative immunofluorescence images of vessels given by CD31 staining (red) in wounds of  $Mr1^{+/+}$  and  $Mr1^{-/-}$  animals four days post-excision (top). Vessel density was quantified by the CD31/DAPI ratio under the two epidermal tongues and in the granulation site in the center, the average of all three measurements for each individual mouse is represented (right). *Pooled data from 2 independent experiments ( $n=5$ ) analyzed blindly. Mann Whitney test.*

Gating strategy used to define Langherans cells,  $CD11b^+Ly6C^{Lo}$  and  $CD11b^+Ly6C^{hi}$   $CD11b^+$  cells (top) and ratio of absolute numbers of NKT,  $\gamma\delta$  T, Langherans,  $CD11b^+Ly6C^{Lo}$  and  $CD11b^+Ly6C^{hi}$  cells (wound/control skin site) for each individual mouse. *Data are representative of 2 independent experiments ( $n=3$ ).*
